# Supplementary material
Source: PubMed Central journal article supplement (PMC4304446)
Supplement: ja5093166_si_003.pdf [file ja5093166_si_003.pdf]

# Chemoselective Activation of $sp^3$ vs $sp^2$ C–H Bonds with Pd(II)

*John M. Curto, Marisa C. Kozlowski\**

## Supporting Information

### Table of Contents

|                                                             |        |
|-------------------------------------------------------------|--------|
| General Considerations                                      | S2     |
| Synthesis of <b>1</b>                                       | S3     |
| General Procedure A – Alkylation with stoichiometric Pd     | S3     |
| General Procedure B – Optimization of catalytic benzylation | S4     |
| General Procedure C – Alkylation with catalytic Pd:         | S4     |
| Metal sources for C–H activation of toluene                 | S5     |
| Table S1 Screen of co-solvents                              | S6     |
| Synthesis of <b>2a-2k, 3-6</b>                              | S7-S20 |
| Table S2 PME studies with 23 oxidants and 2 Pd sources      | S20-21 |
| Optimization of Catalytic Conditions                        | S21-23 |
| KIE Studies                                                 | S23-26 |
| Radical Studies                                             | S26-28 |
| Phenylglycine Azlactone Dimer Studies                       | S29-32 |
| References                                                  | S33    |
| Spectral Data                                               | S34-55 |

## General Considerations

All non-aqueous reactions were carried out under an atmosphere of dry argon unless otherwise noted. Commercial reagents were used as received without additional purification unless otherwise noted. Dichloromethane was distilled from  $\text{CaH}_2$ , and toluene was distilled from metallic sodium prior to use. Anhydrous 1,4-dioxane was purchased from Sigma Aldrich as 100 mL sure-seal bottles and stored in the glovebox. Activated carbon (Darco G-60) was dried overnight at 80 °C *in vacuo*. Reactions were monitored by thin layer chromatography (TLC) using Silicycle glass-backed TLC plates with 250  $\mu\text{m}$  silica and F254 indicator. Visualization was accomplished by UV light.

$^1\text{H}$  NMR and  $^{13}\text{C}$  NMR spectra were recorded on a AM-500 Fourier transform NMR spectrometer at 500 MHz and 125 MHz, respectively. Chemical shifts are reported relative to the solvent resonance peak  $\delta$  7.26 ( $\text{CDCl}_3$ ) for  $^1\text{H}$  and  $\delta$  77.16 ( $\text{CDCl}_3$ ) for  $^{13}\text{C}$ . Data are reported as follows: chemical shift, multiplicity (s = singlet, d = doublet, t = triplet, q = quartet, b = broad singlet, m = multiplet), coupling constants, and number of protons. High resolution mass spectra were obtained using a VG autospec with an ionization mode of either ESI or CI. Infrared spectra are reported in  $\text{cm}^{-1}$ . Melting points are uncorrected. Unless otherwise noted, yields refer to isolated material on the basis of product purity ( $\geq 95\%$ ) by  $^1\text{H}$  NMR following silica gel chromatography with Silica-P flash silica gel (50-63  $\mu\text{m}$  mesh particle size).

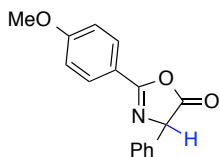

**2-(4-methoxyphenyl)-4-phenyloxazol-5(4H)-one (1).** *N*-*para*-methoxyphenyl-

phenylglycine (500 mg, 1.8 mmol) was added to a flame dried 25 mL round bottom flask equipped with a stirbar under an argon atmosphere. The mixture was dissolved in CH<sub>2</sub>Cl<sub>2</sub> (25 mL) and cooled to 0 °C. *N*-(3-Dimethylaminopropyl)-*N'*-ethylcarbodiimide hydrochloride (EDCI) (441 mg, 2.3 mmol) was added and the mixture was allowed to warm to ambient temperature. After 1 h at ambient temperature, the mixture was diluted with CH<sub>2</sub>Cl<sub>2</sub> (30 mL), washed with H<sub>2</sub>O (2 x 30 mL), 0.1 M NaOAc (2 x 30 mL), H<sub>2</sub>O (50 mL) and brine (50 mL), dried over Na<sub>2</sub>SO<sub>4</sub>, filtered and concentrated *in vacuo* providing **1** (443 mg) in 94% yield as a light yellow solid: <sup>1</sup>H NMR (500 MHz, CDCl<sub>3</sub>) δ 8.04 (d, *J* = 8.9 Hz, 2H), 7.47-7.33 (m, 5H), 7.01 (d, *J* = 8.9 Hz, 2H), 5.49 (s, 1H), 3.90 (s, 3H); <sup>13</sup>C NMR (125 MHz, CDCl<sub>3</sub>) δ 176.6, 163.6, 162.4, 133.9, 130.2, 129.1, 128.8, 127.0, 118.1, 114.4, 68.3, 55.7; IR (film) 3008, 2935, 2839, 1827, 1648, 1608, 1512, 1260 cm<sup>-1</sup>; HRMS (CI) calcd for C<sub>16</sub>H<sub>13</sub>NO<sub>3</sub> [M]<sup>+</sup> *m/z* = 267.0895; found 267.0895.

**General procedure A – benzylation with stoichiometric Pd in neat tolyl analog**

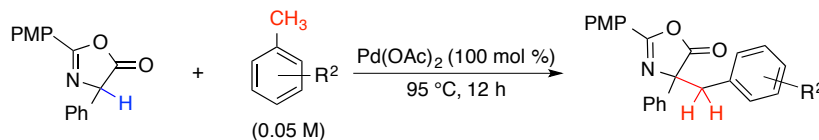

Phenylglycine azlactone **1** (15 mg, 0.056 mmol) and Pd(OAc)<sub>2</sub> (12.5 mg, 0.056 mmol) were added to a flame dried 8 mL microwave vial equipped with a stirbar and brought into the glovebox. The indicated tolyl analog (0.05 M, ~10.5 mmol) was added to

the mixture. The microwave vial was sealed with a Teflon cap, removed from the glovebox, placed in a 95 °C oil bath. After 6 h, the mixture was allowed to cool to ambient temperature, diluted with CH<sub>2</sub>Cl<sub>2</sub> (1 mL), passed through SiO<sub>2</sub> with 30% EtOAc in hexanes, and concentrated *in vacuo*. The resulting residue was purified by column chromatography to afford the alkylated azlactone.

### General procedure B – alkylation with stoichiometric Pd in 1,4-dioxane

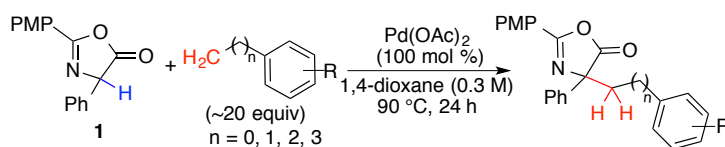

Phenylglycine azlactone **1** (15 mg, 0.056 mmol) and Pd(OAc)<sub>2</sub> (12.5 mg, 0.056 mmol) were added to a flame dried 8 mL microwave vial equipped with a stirbar and brought into the glovebox. The indicated tolyl analog (1.12 mmol) and 1,4-dioxane (200 μL, 0.3 M) were added to the mixture. The microwave vial was sealed with a Teflon cap, removed from the glovebox and placed in a 90 °C oil bath. After 24 h, the mixture was allowed to cool to ambient temperature, diluted with CH<sub>2</sub>Cl<sub>2</sub> (1 mL), passed through SiO<sub>2</sub> with 30% EtOAc in hexanes, and concentrated *in vacuo*. The resulting residue was purified by column chromatography to afford the alkylated azlactone.

### General procedure C – alkylation with catalytic Pd in 1,4-dioxane

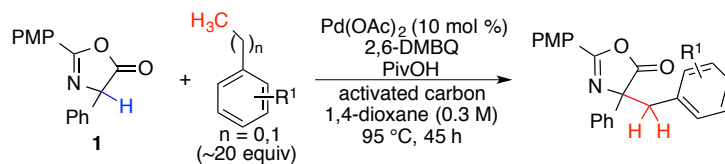

Phenylglycine azlactone **1** (15 mg, 0.056 mmol), Pd(OAc)<sub>2</sub> (1.3 mg, 0.0056 mmol), PivOH (5.7 mg, 0.056 mmol), 2,6-DMBQ (7.6 mg, 0.056 mmol) and activated carbon (13 mg, 10x weight of Pd) were added to a flame dried 8 mL microwave vial equipped with a stirbar and brought into the glovebox. The indicated tolyl analog (1.12 mmol) was added to the mixture followed by 1,4-dioxane (467 μL, 0.12 M). The microwave vial was sealed with a Teflon cap, removed from the glovebox, and placed in a 95 °C oil bath. After 45 h, the mixture was allowed to cool to ambient temperature, diluted with CH<sub>2</sub>Cl<sub>2</sub> (1 mL), and purified directly by column chromatography to afford the alkylated azlactone.

### Metal sources for C–H activation of toluene (Table 1)

| entry | [M] source (100 mol %)                                                | yield (%) <sup>a</sup> | entry | [M] source (100 mol %)                   | yield (%) <sup>a</sup> |
|-------|-----------------------------------------------------------------------|------------------------|-------|------------------------------------------|------------------------|
| 1     | Au(OAc) <sub>3</sub> <sup>b</sup>                                     | 0                      | 7     | Pd(TFA) <sub>2</sub>                     | 81                     |
| 2     | Cu(OAc) <sub>2</sub> <sup>b</sup>                                     | 0                      | 8     | PdCl <sub>2</sub>                        | 0                      |
| 3     | Rh <sub>2</sub> (OAc) <sub>4</sub> <sup>b</sup>                       | 0                      | 9     | PdCl <sub>2</sub> (MeCN) <sub>2</sub>    | 0                      |
| 4     | Ni(OAc) <sub>2</sub> <sup>b</sup>                                     | 0                      | 10    | PdCl <sub>2</sub> (COD) <sub>2</sub>     | 0                      |
| 5     | [Pt <sub>4</sub> (OAc) <sub>8</sub> ] <sup>b</sup> ·HOAc <sup>b</sup> | 0                      | 11    | [Pd(allyl)Cl <sub>2</sub> ] <sub>2</sub> | 0                      |
| 6     | Pd(OAc) <sub>2</sub>                                                  | 77                     | 12    | Pd <sub>2</sub> dba <sub>3</sub>         | 0                      |

<sup>a</sup>Isolated yield. <sup>b</sup>Azlactone dimer as substrate, 20 mol % metal source, 5 h.

For Table 1, entries 1-5: Phenylglycine azlactone dimer **8** (10 mg, 0.019 mmol) was added to a flame dried 8 mL microwave vial equipped with a stirbar and brought into the glovebox. The indicated metal source<sup>1</sup> (0.008 mmol) was added followed by toluene (377 μL). The microwave vial was sealed with a Teflon cap, removed from the glovebox, placed in a 90 °C oil bath. After 5 h, the mixture was allowed to cool to ambient temperature, diluted with CH<sub>2</sub>Cl<sub>2</sub> (1 mL), passed through SiO<sub>2</sub> with 30% EtOAc in

hexanes, and concentrated *in vacuo*. The resulting residues were analyzed by  $^1\text{H}$  NMR spectroscopy and each experiment provided only unreacted phenylglycine azlactone dimer **8**.

For Table 1, entries 6-12: General procedure A was followed with phenylglycine azlactone **1** (10 mg, 0.038 mmol), the indicated metal source (0.038 mmol) and toluene (750  $\mu\text{L}$ ). After 12 h at 90  $^\circ\text{C}$  oil bath, the resulting residues were analyzed by  $^1\text{H}$  NMR spectroscopy: entries 6 and 7 provided full conversion to benzylated product **2a**, entry 8 provided full conversion to phenylglycine azlactone dimer **8** and entries 9-11 provided minimal phenylglycine azlactone dimer **2a** and decomposition of phenylglycine azlactone **1**.

**Table S1. Screen of co-solvents.**

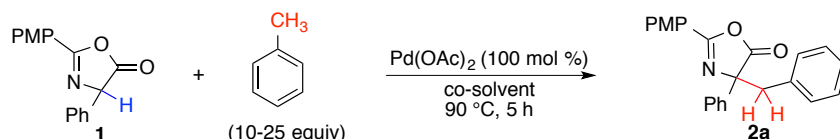

General procedure B was followed using **1** (10 mg, 0.037 mmol) and  $\text{Pd}(\text{OAc})_2$  (8.3 mg, 0.037 mmol) in toluene (0.37 or 0.93 mmol) and co-solvent (133  $\mu\text{L}$ ) at 90  $^\circ\text{C}$  for 5 h.

| entry | co-solvent (0.3 M) | toluene (equiv) | conv (%) <sup>a</sup> | entry | co-solvent (0.3 M) | toluene (equiv) | conv (%) <sup>a</sup> |
|-------|--------------------|-----------------|-----------------------|-------|--------------------|-----------------|-----------------------|
| 1     | none               | 25              | >90                   | 5     | none               | 10              | ~90 (68) <sup>b</sup> |
| 2     | benzene            | 25              | >90                   | 6     | benzene            | 10              | ~90 (65) <sup>b</sup> |
| 3     | cyclohexane        | 25              | >90                   | 7     | 1,4-dioxane        | 10              | 25 <sup>c</sup>       |
| 4     | 1,4-dioxane        | 25              | >90                   |       |                    |                 |                       |

<sup>a</sup>Determined by  $^1\text{H}$  NMR. <sup>b</sup>Isolated yield. <sup>c</sup>3:1 mixture of phenylglycine azlactone and desired product.

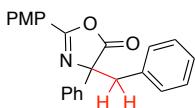

**4-Benzyl-2-(4-methoxyphenyl)-4-phenyloxazol-5(4H)-one (2a).** General procedure B was followed using **1** (15 mg, 0.056 mmol) and Pd(OAc)<sub>2</sub> (12.5 mg, 0.056 mmol) in toluene (118  $\mu$ L, 1.12 mmol) and 1,4-dioxane (200  $\mu$ L) at 90  $^{\circ}$ C for 24 h. Purification by column chromatography (eluent 7% EtOAc in hexanes) provided **2a** (16.5 mg) in 83% yield as a yellow oil: <sup>1</sup>H NMR (500 MHz, CDCl<sub>3</sub>)  $\delta$  7.87 (d,  $J$  = 8.8 Hz, 2H), 7.79 (d,  $J$  = 8.0 Hz, 2H), 7.41 (t,  $J$  = 7.6 Hz, 2H), 7.34 (t,  $J$  = 7.4 Hz, 1H), 7.24-7.12 (m, 5H), 6.93 (d,  $J$  = 8.8 Hz, 2H), 3.85 (s, 3H), 3.51 (d,  $J$  = 13.4 Hz, 1H), 3.44 (d,  $J$  = 13.4 Hz, 1H); <sup>13</sup>C NMR (125 MHz, CDCl<sub>3</sub>)  $\delta$  178.4, 163.2, 159.7, 138.4, 134.4, 130.6, 129.9, 128.8, 128.4, 128.2, 127.4, 126.0, 118.2, 114.2, 75.6, 55.6, 47.4; IR (film) 3031, 2925, 1813, 1653, 1608, 1513, 1260  $\text{cm}^{-1}$ ; HRMS (CI) calcd for C<sub>16</sub>H<sub>12</sub>NO<sub>3</sub> [M-C<sub>7</sub>H<sub>7</sub>]<sup>+</sup>  $m/z$  = 266.0817; found 266.0826.

**4-Benzyl-2-(4-methoxyphenyl)-4-phenyloxazol-5(4H)-one (2a).** General procedure A was followed with **1** (15 mg, 0.056 mmol) and Pd(OAc)<sub>2</sub> (12.5 mg, 0.056 mmol) in toluene (474  $\mu$ L, 4.5 mmol). The mixture was allowed to stir at 90  $^{\circ}$ C for 5 h and purification by column chromatography provided **2a** (16.5 mg) in 83% yield. See above for characterization.

**4-Benzyl-2-(4-methoxyphenyl)-4-phenyloxazol-5(4H)-one (2a).** General procedure C was followed using **1** (15 mg, 0.056 mmol), Pd(OAc)<sub>2</sub> (1.3 mg, 0.0056 mmol), PivOH (5.7 mg, 0.056 mmol), 2,6-DMBQ (7.6 mg, 0.056 mmol) and activated carbon (13 mg, 10x weight of Pd) in toluene (118  $\mu$ L, 1.12 mmol) and 1,4-dioxane (467  $\mu$ L, 0.12 M) at

95 °C for 45 h. Purification by column chromatography (eluent 8% EtOAc in hexanes) provided **2a** (16.3 mg) in 82% yield. See above for characterization.

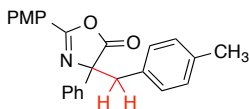

**2-(4-Methoxyphenyl)-4-(4-methylbenzyl)-4-phenyloxazol-5(4H)-one (2b).** General procedure B was followed using **1** (15 mg, 0.056 mmol) and Pd(OAc)<sub>2</sub> (12.5 mg, 0.056 mmol) in *para*-xylene (140 μL, 1.12 mmol) and 1,4-dioxane (200 μL) at 90 °C for 24 h. Purification by column chromatography (eluent 7% EtOAc in hexanes) provided **2b** (16.2 mg) in 78% yield as a yellow oil: <sup>1</sup>H NMR (500 MHz, CDCl<sub>3</sub>) δ 7.88 (d, *J* = 8.8 Hz, 2H), 7.78 (d, *J* = 7.9 Hz, 2H), 7.40 (t, *J* = 7.5 Hz, 2H), 7.34 (t, *J* = 7.3 Hz, 1H), 7.09 (d, *J* = 7.9 Hz, 2H), 6.98 (d, *J* = 7.8 Hz, 2H), 6.94 (d, *J* = 8.9 Hz, 2H), 3.86 (s, 3H), 3.47 (d, *J* = 13.6 Hz, 1H), 3.40 (d, *J* = 13.4 Hz), 2.23 (s, 3H); <sup>13</sup>C NMR (125 MHz, CDCl<sub>3</sub>) δ 178.4, 163.2, 159.7, 138.6, 136.9, 131.3, 130.4, 130.0, 128.9, 128.8, 128.3, 126.0, 118.3, 114.2, 75.7, 55.6, 47.1, 21.2; IR (film) 3007, 2962, 2927, 1813, 1654, 1608, 1512, 1260 cm<sup>-1</sup>; HRMS (ESI) calcd for C<sub>24</sub>H<sub>22</sub>NO<sub>3</sub> [M+H]<sup>+</sup> *m/z* = 372.1600; found 372.1594.

**2-(4-Methoxyphenyl)-4-(4-methylbenzyl)-4-phenyloxazol-5(4H)-one (2b).** General procedure A was followed with **1** (15 mg, 0.056 mmol) and Pd(OAc)<sub>2</sub> (12.5 mg, 0.056 mmol) in *para*-xylene (546 μL, 4.5 mmol). The mixture was allowed to stir at 90 °C for 12 h and purification by column chromatography provided **2b** (17.2 mg) in 83% yield. See above for characterization.



**2-(4-Methoxyphenyl)-4-(4-methylbenzyl)-4-phenyloxazol-5(4H)-one (2b).** General procedure C was followed using **1** (15 mg, 0.056 mmol), Pd(OAc)<sub>2</sub> (3.9 mg, 0.017 mmol), PivOH (4.6 mg, 0.045 mmol), 2,6-DMBQ (6.1 mg, 0.045 mmol) and 3 Å MS (12 mg, 3x weight of Pd) in *para*-xylene (140 μL, 1.12 mmol) and 1,4-dioxane (187 μL, 0.3 M) at 95 °C for 24 h. Purification by column chromatography (eluent 8% EtOAc in hexanes) provided **2b** (8.1 mg) in 39% yield. See above for characterization.

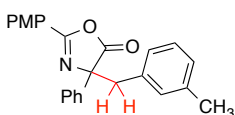

**2-(4-Methoxyphenyl)-4-(3-methylbenzyl)-4-phenyloxazol-5(4H)-one (2c).** General procedure B was followed using **1** (15 mg, 0.056 mmol) and Pd(OAc)<sub>2</sub> (12.5 mg, 0.056 mmol) in *meta*-xylene (140 μL, 1.12 mmol) and 1,4-dioxane (200 μL) at 90 °C for 24 h. Purification by column chromatography (eluent 7% EtOAc in hexanes) provided **2c** (16.3 mg) in 78% yield as a yellow oil: <sup>1</sup>H NMR (500 MHz, CDCl<sub>3</sub>) δ 7.86 (d, *J* = 8.9 Hz, 2H), 7.79 (d, *J* = 7.8 Hz, 2H), 7.41 (t, *J* = 7.6 Hz, 2H), 7.34 (t, *J* = 7.3 Hz, 1H), 7.08-7.00 (m, 3H), 6.96-6.92 (m, 3H), 3.85 (s, 3H), 3.47 (d, *J* = 13.2 Hz, 1H), 3.40 (d, *J* = 13.2 Hz), 2.19 (s, 3H); <sup>13</sup>C NMR (125 MHz, CDCl<sub>3</sub>) δ 178.4, 163.2, 159.7, 138.5, 137.6, 134.3, 131.5, 129.9, 128.8, 128.4, 128.1, 128.0, 127.5, 126.0, 118.3, 114.2, 75.6, 55.6, 47.5, 21.4; IR (film) 3062, 2929, 1813, 1653, 1604, 1512, 1257 cm<sup>-1</sup>; HRMS (ESI) calcd for C<sub>24</sub>H<sub>22</sub>NO<sub>3</sub> [M+H]<sup>+</sup> *m/z* = 372.1600; found 372.1600.

**2-(4-Methoxyphenyl)-4-(3-methylbenzyl)-4-phenyloxazol-5(4H)-one (2c).** General procedure A was followed with **1** (15 mg, 0.056 mmol) and Pd(OAc)<sub>2</sub> (12.5 mg, 0.056 mmol) in *meta*-xylene (546 μL, 4.5 mmol). The mixture was allowed to stir at 90 °C for

12 h and purification by column chromatography provided **2c** (15.6 mg) in 75% yield. See above for characterization.

**2-(4-Methoxyphenyl)-4-(3-methylbenzyl)-4-phenyloxazol-5(4H)-one (2c).** General procedure C was followed using **1** (15 mg, 0.056 mmol), Pd(OAc)<sub>2</sub> (3.9 mg, 0.017 mmol), PivOH (4.6 mg, 0.045 mmol), 2,6-DMBQ (6.1 mg, 0.045 mmol) and 3 Å MS (12 mg, 3x weight of Pd) in *meta*-xylene (140 μL, 1.12 mmol) and 1,4-dioxane (187 μL, 0.3 M) at 95 °C for 24 h. Purification by column chromatography (eluent 8% EtOAc in hexanes) provided **2c** (11.2 mg) in 54% yield. See above for characterization.

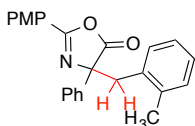

**2-(4-Methoxyphenyl)-4-(2-methylbenzyl)-4-phenyloxazol-5(4H)-one (2d).** General procedure B was followed using **1** (15 mg, 0.056 mmol) and Pd(OAc)<sub>2</sub> (12.5 mg, 0.056 mmol) in *ortho*-xylene (140 μL, 1.12 mmol) and 1,4-dioxane (200 μL) at 90 °C for 24 h. Purification by column chromatography (eluent 7% EtOAc in hexanes) provided **2d** (8.4 mg) in 40% yield as a yellow oil. See below for characterization.

**2-(4-Methoxyphenyl)-4-(2-methylbenzyl)-4-phenyloxazol-5(4H)-one (2d).** General procedure A was followed with **1** (15 mg, 0.056 mmol) and Pd(OAc)<sub>2</sub> (12.5 mg, 0.056 mmol) in *ortho*-xylene (546 μL, 4.5 mmol). The mixture was allowed to stir at 90 °C for 12 h and purification by column chromatography provided **2d** (14 mg) in 67% yield: <sup>1</sup>H NMR (500 MHz, CDCl<sub>3</sub>) δ 7.84 (d, *J* = 8.8 Hz, 2H), 7.80 (d, *J* = 8.6 Hz, 2H), 7.42 (t, *J* = 7.5 Hz, 2H), 7.34 (t, *J* = 7.4 Hz, 1H), 7.15 (d, *J* = 7.3 Hz, 1H), 7.04-6.99 (m, 3H), 6.92 (d, *J* = 8.9 Hz, 2H), 3.85 (s, 3H), 3.55 (d, *J* = 13.7 Hz, 1H), 3.51 (d, *J* = 13.7 Hz, 1H), 2.39

(s, 3H);  $^{13}\text{C}$  NMR (125 MHz,  $\text{CDCl}_3$ )  $\delta$  178.9, 163.2, 159.4, 138.8, 138.1, 133.1, 130.8, 130.5, 129.9, 128.8, 128.3, 127.5, 126.0, 125.7, 118.3, 114.3, 76.2, 55.6, 44.1, 20.2; IR (film) 2963, 2928, 1813, 1653, 1609, 1512, 1260  $\text{cm}^{-1}$ ; HRMS (ESI) calcd for  $\text{C}_{24}\text{H}_{22}\text{NO}_3$   $[\text{M}+\text{H}]^+$   $m/z$  = 372.1600; found 372.1588.

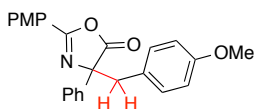

**2-(4-Methoxyphenyl)-4-(4-methoxybenzyl)-4-phenyloxazol-5(4H)-one (2e).** General procedure B was followed using **1** (15 mg, 0.056 mmol) and  $\text{Pd}(\text{OAc})_2$  (12.5 mg, 0.056 mmol) in *para*-methylanisole (141  $\mu\text{L}$ , 1.12 mmol) and 1,4-dioxane (200  $\mu\text{L}$ ) at 90  $^\circ\text{C}$  for 24 h. Purification by column chromatography (eluent 7% EtOAc in hexanes) provided **2e** (15.4 mg) in 71% yield as a yellow oil:  $^1\text{H}$  NMR (500 MHz,  $\text{CDCl}_3$ )  $\delta$  7.88 (d,  $J$  = 8.0 Hz, 2H), 7.77 (d,  $J$  = 8.0 Hz, 2H), 7.40 (t,  $J$  = 7.3 Hz, 2H), 7.33 (t,  $J$  = 7.3 Hz, 1H), 7.12 (d,  $J$  = 7.4 Hz, 2H), 6.93 (d,  $J$  = 8.4 Hz, 2H), 6.71 (d,  $J$  = 8.4 Hz, 2H), 3.86 (s, 3H), 3.71 (s, 3H), 3.45 (d,  $J$  = 13.6 Hz, 1H), 3.38 (d,  $J$  = 13.6 Hz, 1H);  $^{13}\text{C}$  NMR (125 MHz,  $\text{CDCl}_3$ )  $\delta$  178.5, 163.3, 159.7, 158.9, 138.5, 131.7, 129.9, 128.8, 128.3, 126.5, 126.0, 118.3, 114.3, 113.6, 75.8, 55.6, 55.3, 46.7; IR (film) 2961, 2926, 2851, 1812, 1760, 1655, 1610, 1513, 1259  $\text{cm}^{-1}$ ; HRMS (ESI) calcd for  $\text{C}_{24}\text{H}_{22}\text{NO}_4$   $[\text{M}+\text{H}]^+$   $m/z$  = 388.1549; found 388.1551.

**2-(4-Methoxyphenyl)-4-(4-methoxybenzyl)-4-phenyloxazol-5(4H)-one (2e).** General procedure A was followed with **1** (15 mg, 0.056 mmol) and  $\text{Pd}(\text{OAc})_2$  (12.5 mg, 0.056 mmol) in *para*-methylanisole (566  $\mu\text{L}$ , 4.5 mmol). The mixture was allowed to stir at 90

°C for 5 h and purification by column chromatography provided **2e** (14 mg) in 67% yield. See above for characterization.

**2-(4-Methoxyphenyl)-4-(4-methoxybenzyl)-4-phenyloxazol-5(4H)-one (2e).** General procedure C was followed using **1** (15 mg, 0.056 mmol), Pd(OAc)<sub>2</sub> (3.9 mg, 0.017 mmol), PivOH (4.6 mg, 0.045 mmol), 2,6-DMBQ (6.1 mg, 0.045 mmol) and 3 Å MS (12 mg, 3x weight of Pd) in *para*-methylanisole (141 µL, 1.12 mmol) and 2-methyl-2-butanol (187 µL, 0.3 M) at 95 °C for 24 h. Purification by column chromatography (eluent 8% EtOAc in hexanes) provided **2e** (9.1 mg) in 42% yield. See above for characterization.

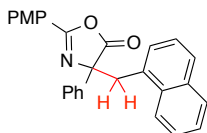

**2-(4-Methoxyphenyl)-4-(naphthalen-1-ylmethyl)-4-phenyloxazol-5(4H)-one (2f)**

General procedure B was followed using **1** (15 mg, 0.056 mmol) and Pd(OAc)<sub>2</sub> (12.5 mg, 0.056 mmol) in 1-methylnaphthalene (159 µL, 1.12 mmol) and 1,4-dioxane (200 µL) at 90 °C for 24 h. Purification by column chromatography (eluent 7% EtOAc in hexanes) provided **2f** (15.5 mg) in 68% yield as a yellow oil: <sup>1</sup>H NMR (500 MHz, CDCl<sub>3</sub>) δ 8.27 (d, *J* = 8.6 Hz, 1H), 7.88 (d, *J* = 8.1 Hz, 2H), 7.72 (d, *J* = 8.2 Hz, 1H), 7.67 (d, *J* = 8.2 Hz, 1H), 7.58 (d, *J* = 8.8 Hz, 2H), 7.53 (t, *J* = 7.7 Hz, 1H), 7.46-7.34 (m, 5H), 7.30 (t, *J* = 7.6 Hz, 1H), 6.78 (d, *J* = 8.9 Hz, 2H), 4.02 (d, *J* = 13.7 Hz, 1H), 3.94 (d, *J* = 13.7 Hz, 1H), 3.78 (s, 3H); <sup>13</sup>C NMR (125 MHz, CDCl<sub>3</sub>) δ 178.7, 163.0, 159.4, 138.7, 133.8, 132.9, 131.0, 129.8, 129.0, 128.9, 128.4, 128.4, 128.4, 126.0, 125.6, 125.5, 125.4, 125.2, 118.0,

114.0, 76.2, 55.5, 43.6; IR (film) 2926, 2051, 1812, 1652, 1609, 1512, 1260  $\text{cm}^{-1}$ ; HRMS (ESI) calcd for  $\text{C}_{27}\text{H}_{22}\text{NO}_3$   $[\text{M}+\text{H}]^+$   $m/z = 408.1600$ ; found 408.1612.

**2-(4-Methoxyphenyl)-4-(naphthalen-1-ylmethyl)-4-phenyloxazol-5(4H)-one (2f).**

General procedure A was followed with **1** (15 mg, 0.056 mmol) and  $\text{Pd}(\text{OAc})_2$  (12.5 mg, 0.056 mmol) in 1-methylnaphthalene (638  $\mu\text{L}$ , 4.5 mmol). The mixture was allowed to stir at 90  $^\circ\text{C}$  for 12 h and purification by column chromatography provided **2f** (14.8 mg) in 65% yield. See above for characterization.

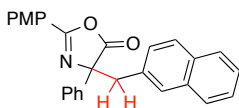

**2-(4-Methoxyphenyl)-4-(naphthalen-2-ylmethyl)-4-phenyloxazol-5(4H)-one (2g)**

General procedure B was followed using **1** (15 mg, 0.056 mmol) and  $\text{Pd}(\text{OAc})_2$  (12.5 mg, 0.056 mmol) in 2-methylnaphthalene (160 mg, 1.12 mmol) and 1,4-dioxane (200  $\mu\text{L}$ ) at 95  $^\circ\text{C}$  for 24 h. Purification by column chromatography (eluent 8% EtOAc in hexanes) provided **2g** (22 mg) in 96% yield as a yellow oil:  $^1\text{H}$  NMR (500 MHz,  $\text{CDCl}_3$ )  $\delta$  7.87-7.80 (m, 4H), 7.74-7.70 (m, 2H), 7.68 (s, 1H), 7.64 (d,  $J = 8.4$  Hz, 1H), 7.45-7.37 (m, 4H) 7.35 (t,  $J = 7.8$  Hz, 2H), 6.89 (d,  $J = 8.6$  Hz, 2H), 3.83 (s, 3H), 3.68 (d,  $J = 13.5$  Hz, 1H) 3.61 (d,  $J = 13.5$  Hz, 1H);  $^{13}\text{C}$  NMR (125 MHz,  $\text{CDCl}_3$ )  $\delta$  178.4, 163.3, 159.9, 138.6, 133.3, 132.7, 132.2, 130.0, 129.6, 128.8, 128.7, 128.4, 128.0, 127.6, 127.6 126.0, 126.0, 125.8, 118.2, 114.2, 75.7, 55.6, 47.5; IR (film) 3057, 2927, 1813, 1654, 1609, 1511, 1260  $\text{cm}^{-1}$ ; HRMS (ESI) calcd for  $\text{C}_{27}\text{H}_{22}\text{NO}_3$   $[\text{M}+\text{H}]^+$   $m/z = 408.1600$ ; found 408.1590.

**2-(4-Methoxyphenyl)-4-(naphthalen-2-ylmethyl)-4-phenyloxazol-5(4H)-one (2g).**

General procedure A was followed with **1** (15 mg, 0.056 mmol) and  $\text{Pd}(\text{OAc})_2$  (12.5 mg,

0.056 mmol) in 2-methylnaphthalene (643 mg, 4.5 mmol). The mixture was allowed to stir at 90 °C for 12 h and purification by column chromatography (eluent 8% EtOAc in hexanes) provided **2g** (17.8 mg) in 78% yield. See above for characterization.

**2-(4-Methoxyphenyl)-4-(naphthalen-2-ylmethyl)-4-phenyloxazol-5(4H)-one (2g)**

General procedure C was followed using **1** (15 mg, 0.056 mmol), Pd(OAc)<sub>2</sub> (1.3 mg, 0.0056 mmol), PivOH (5.7 mg, 0.056 mmol), 2,6-DMBQ (7.6 mg, 0.056 mmol), activated carbon (13 mg, 10x weight of Pd) and 2-methylnaphthalene (159 mg, 1.12 mmol) and 1,4-dioxane (467 μL, 0.12 M) at 95 °C for 45 h. Purification by column chromatography (eluent 8% EtOAc in hexanes) provided **2g** (20.1 mg) in 88% yield. See above for characterization.

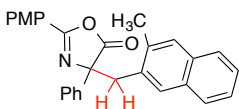

**2-(4-Methoxyphenyl)-4-((3-methylnaphthalen-2-yl)methyl)-4-phenyloxazol-5(4H)-**

**one (2h).** General procedure B was followed using **1** (15 mg, 0.056 mmol) and Pd(OAc)<sub>2</sub> (12.5 mg, 0.056 mmol) in 2,3-dimethylnaphthalene (175 mg, 1.12 mmol) and 1,4-dioxane (200 μL) at 90 °C for 24 h. Purification by column chromatography (eluent 8% EtOAc in hexanes) provided unreacted 2,3-dimethylnaphthalene (~150 mg) and **2h** (23.4 mg) in 98% yield as a yellow oil: <sup>1</sup>H NMR (500 MHz, CDCl<sub>3</sub>) δ 7.84 (d, *J* = 7.4 Hz, 2H), 7.80 (d, *J* = 8.5 Hz, 2H), 7.68-7.61 (m, 3H), 7.51 (s, 1H), 7.43 (t, *J* = 7.8 Hz, 2H), 7.39-7.30 (m, 3H), 6.87 (d, *J* = 8.6 Hz, 2H), 3.82 (s, 3H), 3.72 (d, *J* = 13.7 Hz, 1H), 3.67 (d, *J* = 13.7 Hz, 1H), 2.58 (s, 3H); <sup>13</sup>C NMR (125 MHz, CDCl<sub>3</sub>) δ 178.9, 163.2, 159.5, 144.8, 138.9, 136.1, 133.0, 132.2, 132.0, 129.9, 128.9, 128.4, 128.3, 127.7, 126.8, 126.0, 125.9,

125.1, 118.2, 114.2, 76.4, 55.6, 44.0, 20.8; IR (film) 3057, 2961, 2932, 1813, 1653, 1609, 1512, 1259  $\text{cm}^{-1}$ ; HRMS (ESI) calcd for  $\text{C}_{28}\text{H}_{24}\text{NO}_3$   $[\text{M}+\text{H}]^+$   $m/z = 422.1756$ ; found 422.1758.

**2-(4-Methoxyphenyl)-4-((3-methylnaphthalen-2-yl)methyl)-4-phenyloxazol-5(4H)-one (2h).** General procedure A was followed with **1** (15 mg, 0.056 mmol) and  $\text{Pd}(\text{OAc})_2$  (12.5 mg, 0.056 mmol) in 2,3-dimethylnaphthalene (706 mg, 4.5 mmol). The mixture was allowed to stir at 90 °C for 12 h and purification by column chromatography provided **2h** (18.9 mg) in 80% yield. See above for characterization.

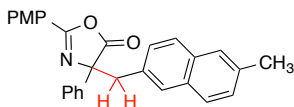

**2-(4-Methoxyphenyl)-4-((6-methylnaphthalen-2-yl)methyl)-4-phenyloxazol-5(4H)-one (2i).** General procedure B was followed using **1** (15 mg, 0.056 mmol) and  $\text{Pd}(\text{OAc})_2$  (12.5 mg, 0.056 mmol) in 2,6-dimethylnaphthalene (175 mg, 1.12 mmol) and 1,4-dioxane (200  $\mu\text{L}$ ) at 90 °C for 24 h. Purification by column chromatography (eluent 8% EtOAc in hexanes) provided unreacted 2,6-dimethylnaphthalene (~150 mg) and **2i** (18.1 mg) in 76% yield as a yellow oil:  $^1\text{H}$  NMR (500 MHz,  $\text{CDCl}_3$ )  $\delta$  7.87-7.79 (m, 4H), 7.62 (d,  $J = 8.1$  Hz, 2H), 7.55 (d,  $J = 8.5$  Hz, 1H), 7.48 (s, 1H), 7.41 (t,  $J = 7.6$  Hz, 2H), 7.35 (t,  $J = 7.2$  Hz, 1H), 7.30 (d,  $J = 8.4$  Hz, 1H), 7.23 (d,  $J = 8.4$  Hz, 1H), 6.89 (d,  $J = 8.8$  Hz, 2H), 3.83 (s, 3H), 3.66 (d,  $J = 13.5$  Hz, 1H), 3.58 (d,  $J = 13.5$  Hz, 1H), 2.45 (s, 3H);  $^{13}\text{C}$  NMR (125 MHz,  $\text{CDCl}_3$ )  $\delta$  178.5, 163.2, 159.8, 138.6, 135.5, 132.9, 131.6, 131.2, 130.0, 129.3, 128.8, 128.8, 128.4, 128.2, 127.8, 126.9, 126.6, 126.0, 118.2, 114.2, 75.8, 55.6, 47.5,

21.8; IR (film) 3055, 2923, 2852, 1812, 1653, 1609, 1512, 1260  $\text{cm}^{-1}$ ; HRMS (ESI) calcd for  $\text{C}_{28}\text{H}_{24}\text{NO}_3$   $[\text{M}+\text{H}]^+$   $m/z = 422.1756$ ; found 422.1751.

**2-(4-Methoxyphenyl)-4-((6-methylnaphthalen-2-yl)methyl)-4-phenyloxazol-5(4H)-one (2i).** General procedure A was followed with **1** (15 mg, 0.056 mmol) and  $\text{Pd}(\text{OAc})_2$  (12.5 mg, 0.056 mmol) in 2,6-dimethylnaphthalene (706 mg, 4.5 mmol). The mixture was allowed to stir at 90 °C for 12 h and purification by column chromatography provided **2i** (18.9 mg) in 80% yield. See above for characterization.

**2-(4-Methoxyphenyl)-4-((6-methylnaphthalen-2-yl)methyl)-4-phenyloxazol-5(4H)-one (2i).** General procedure C was followed using **1** (12 mg, 0.044 mmol),  $\text{Pd}(\text{OAc})_2$  (1.0 mg, 0.0044 mmol), PivOH (4.5 mg, 0.044 mmol), 2,6-DMBQ (5.9 mg, 0.044 mmol), and 2,6-dimethylnaphthalene (345 mg, 2.2 mmol) at 110 °C for 15 h. Purification by column chromatography (eluent 8% EtOAc in hexanes) provided **2i** (8.3 mg) in 45% yield. See above for characterization.

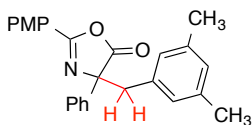

**4-(3,5-dimethylbenzyl)-2-(4-methoxyphenyl)-4-phenyloxazol-5(4H)-one (2j).** General procedure A was followed using **1** (10 mg, 0.037 mmol) and  $\text{Pd}(\text{OAc})_2$  (8.3 mg, 0.037 mmol) in mesitylene (750  $\mu\text{L}$ , 5.4 mmol). The mixture was allowed to stir at 140 °C for 15 h and purification by column chromatography provided **2j** (2.0 mg) in 14% yield as a yellow oil:  $^1\text{H}$  NMR (500 MHz,  $\text{CDCl}_3$ )  $\delta$  7.87 (d,  $J = 9.0$  Hz, 2H), 7.79 (d,  $J = 8.4$  Hz, 2H), 7.41 (t,  $J = 7.6$  Hz, 2H), 7.34 (d,  $J = 7.4$  Hz, 1H), 6.93 (d,  $J = 9.0$  Hz, 2H), 6.82 (s, 2H), 6.76 (s, 1H), 3.86 (s, 3H) 3.43 (d,  $J = 13.4$  Hz, 1H), 3.37 (d,  $J = 13.4$  Hz, 1H), 2.15



(s, 6H);  $^{13}\text{C}$  NMR (125 MHz,  $\text{CDCl}_3$ )  $\delta$  178.4, 163.2, 159.7, 138.6, 137.5, 134.2, 129.9, 128.9, 128.8, 128.3, 126.0, 118.3, 114.2, 113.9, 75.7, 55.6, 47.5, 21.2; IR (film) 2925, 2853, 1813, 1727, 1655, 1608, 1512  $\text{cm}^{-1}$ ; HRMS (ESI) calcd for  $\text{C}_{25}\text{H}_{24}\text{NO}_3$   $[\text{M}+\text{H}]^+$   $m/z = 386.1756$ ; found 386.1750.

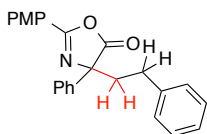

**2-(4-Methoxyphenyl)-4-phenethyl-4-phenyloxazol-5(4H)-one (3).** General procedure B was followed using **1** (15 mg, 0.056 mmol) and  $\text{Pd}(\text{OAc})_2$  (12.5 mg, 0.056 mmol) in ethylbenzene (140  $\mu\text{L}$ , 1.12 mmol) and 1,4-dioxane (200  $\mu\text{L}$ ) at 90  $^\circ\text{C}$  for 24 h. Purification by column chromatography (eluent 7% EtOAc in hexanes) provided **3** (15.1 mg) in 72% yield as a yellow oil:  $^1\text{H}$  NMR (500 MHz,  $\text{CDCl}_3$ )  $\delta$  8.07 (d,  $J = 8.6$  Hz, 2H), 7.71 (d,  $J = 7.3$  Hz, 2H), 7.39 (t,  $J = 7.8$  Hz, 2H), 7.32 (t,  $J = 7.1$  Hz, 1H), 7.24 (t,  $J = 7.6$  Hz, 2H), 7.18-7.12 (m, 3H), 7.02 (d,  $J = 8.6$  Hz, 2H), 3.90 (s, 3H), 2.66-2.58 (m, 2H), 2.56-2.43 (m, 2H);  $^{13}\text{C}$  NMR (125 MHz,  $\text{CDCl}_3$ )  $\delta$  179.0, 163.5, 160.3, 140.7, 138.5, 130.2, 128.8, 128.6, 128.5, 128.3, 126.3, 125.8, 118.3, 114.4, 74.2, 55.7, 42.8, 30.8; IR (film) 3027, 2933, 1814, 1652, 1609, 1512, 1260  $\text{cm}^{-1}$ ; HRMS (ESI) calcd for  $\text{C}_{24}\text{H}_{22}\text{NO}_3$   $[\text{M}+\text{H}]^+$   $m/z = 371.2600$ ; found 372.1613.

**2-(4-Methoxyphenyl)-4-phenethyl-4-phenyloxazol-5(4H)-one (3).** General procedure C was followed using **1** (15 mg, 0.056 mmol),  $\text{Pd}(\text{OAc})_2$  (1.3 mg, 0.0056 mmol), PivOH (5.7 mg, 0.056 mmol), 2,6-DMBQ (7.6 mg, 0.056 mmol) and activated carbon (13 mg, 10x weight of Pd) in ethylbenzene (137  $\mu\text{L}$ , 1.12 mmol) and 1,4-dioxane (467  $\mu\text{L}$ , 0.12

M) at 95 °C for 45 h. Purification by column chromatography (eluent 7% EtOAc in hexanes) provided **3** (14.1 mg) in 68% yield. See above for characterization.

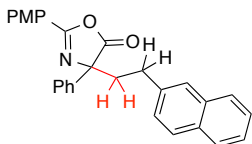

**2-(4-Methoxyphenyl)-4-(2-(naphthalen-2-yl)ethyl)-4-phenyloxazol-5(4H)-one (4).**

General procedure B was followed using **1** (15 mg, 0.056 mmol) and Pd(OAc)<sub>2</sub> (12.5 mg, 0.056 mmol) in 2-ethylnaphthalene (175 μL, 1.12 mmol) and 1,4-dioxane (200 μL) at 90 °C for 24 h. Purification by column chromatography (eluent 8% EtOAc in hexanes) provided **4** (15.3 mg) in 65% yield as a yellow oil: <sup>1</sup>H NMR (500 MHz, CDCl<sub>3</sub>) δ 8.06 (d, *J* = 8.6 Hz, 2H), 7.77 (d, *J* = 7.3 Hz, 1H), 7.75-7.68 (m, 4H), 7.57 (s, 1H), 7.45-7.36 (m, 4H), 7.33 (t, *J* = 7.3 Hz, 1H), 7.28 (d, *J* = 8.6 Hz, 1H), 7.02 (d, *J* = 9.0 Hz, 2H), 3.90 (s, 3H), 2.86-2.74 (m, 2H), 2.65-2.52 (m, 2H); <sup>13</sup>C NMR (125 MHz, CDCl<sub>3</sub>) δ 179.0, 163.5, 160.3, 138.5, 138.1, 133.7, 132.2, 130.2, 128.8, 128.3, 128.1, 127.7, 127.5, 127.2, 126.6, 126.1, 125.8, 125.4, 118.2, 114.4, 74.2, 56.7, 42.6, 30.9; IR (film) 3056, 2930, 1813, 1652, 1608, 1511, 1260 cm<sup>-1</sup>; HRMS (ESI) calcd for C<sub>28</sub>H<sub>23</sub>NO<sub>3</sub>Na [M+Na]<sup>+</sup> *m/z* = 444.1576; found 444.1571.

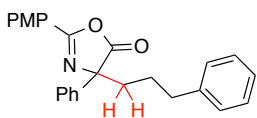

**2-(4-methoxyphenyl)-4-phenyl-4-(3-phenylpropyl)oxazol-5(4H)-one (5).**

General procedure B was followed using **1** (15 mg, 0.056 mmol) and Pd(OAc)<sub>2</sub> (12.5 mg, 0.056 mmol) in propylbenzene (140 μL, 1.00 mmol) and 1,4-dioxane (200 μL) at 90 °C for 24

h. Purification by column chromatography (eluent 7% EtOAc in hexanes) provided **5** (15.3 mg) in 62% yield as a yellow oil:  $^1\text{H}$  NMR (500 MHz,  $\text{CDCl}_3$ )  $\delta$  8.03 (d,  $J = 9.1$  Hz, 2H), 7.66 (d,  $J = 7.9$  Hz, 2H), 7.37 (t,  $J = 7.5$  Hz, 2H), 7.31 (t,  $J = 7.2$  Hz, 1H), 7.24 (d,  $J = 7.7$  Hz, 2H), 7.16 (t,  $J = 7.3$  Hz, 1H), 7.12 (d,  $J = 7.9$  Hz, 2H), 7.00 (d,  $J = 9.0$  Hz, 2H), 3.89 (s, 3H), 2.70-2.55 (m, 2H), 2.30-2.18 (m, 2H), 1.71-1.61 (m, 2H);  $^{13}\text{C}$  NMR (125 MHz,  $\text{CDCl}_3$ )  $\delta$  179.2, 163.4, 160.0, 141.6, 138.7, 130.1, 128.7, 128.5, 128.5, 128.2, 126.0, 125.8, 118.3, 114.4, 74.3, 55.7, 40.8, 35.7, 26.2; IR (film) 2952, 2933, 1815, 1653, 1601, 1512, 1260  $\text{cm}^{-1}$ ; HRMS (ESI) calcd for  $\text{C}_{25}\text{H}_{24}\text{NO}_3$   $[\text{M}+\text{H}]^+$   $m/z = 386.1756$ ; found 386.1739.

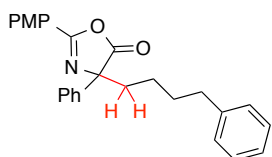

**2-(4-methoxyphenyl)-4-phenyl-4-(4-phenylbutyl)oxazol-5(4H)-one (6).** General procedure B was followed using **1** (20 mg, 0.075 mmol) and  $\text{Pd}(\text{OAc})_2$  (16.9 mg, 0.075 mmol) in butylbenzene (190  $\mu\text{L}$ , 1.21 mmol) and 1,4-dioxane (270  $\mu\text{L}$ ) at 90  $^\circ\text{C}$  for 24 h. Purification by column chromatography (eluent 7% EtOAc in hexanes) provided **6** (13.8 mg) in 46% yield as a yellow oil:  $^1\text{H}$  NMR (500 MHz,  $\text{CDCl}_3$ )  $\delta$  8.03 (d,  $J = 8.1$  Hz, 2H), 7.67 (d,  $J = 8.1$  Hz, 2H), 7.37 (t,  $J = 7.4$  Hz, 2H), 7.31 (t,  $J = 7.4$  Hz, 1H), 7.23 (t,  $J = 7.5$  Hz, 2H), 7.14 (t,  $J = 7.2$  Hz, 2H), 7.10 (d,  $J = 7.5$  Hz, 2H), 7.01 (d,  $J = 8.1$  Hz, 2H), 3.89 (s, 3H), 2.55 (t,  $J = 7.9$  Hz, 2H), 2.22 (t,  $J = 8.2$  Hz, 2H), 1.61 (m, 2H), 1.37 (m, 2H);  $^{13}\text{C}$  NMR (125 MHz,  $\text{CDCl}_3$ )  $\delta$  179.3, 163.4, 160.0, 142.4, 138.8, 130.1, 128.8, 128.4, 128.4, 128.2, 125.8, 125.8, 118.4, 114.4, 74.4, 55.7, 41.1, 35.8, 31.4, 24.1; IR (film) 2931, 2856,

1811, 1652, 1609, 1512, 1260  $\text{cm}^{-1}$ ; HRMS (ESI) calcd for  $\text{C}_{26}\text{H}_{26}\text{NO}_3$   $[\text{M}+\text{H}]^+$   $m/z = 400.1913$ ; found 400.1913.

**Table S2. PME studies with 23 oxidants and 2 Pd sources.**

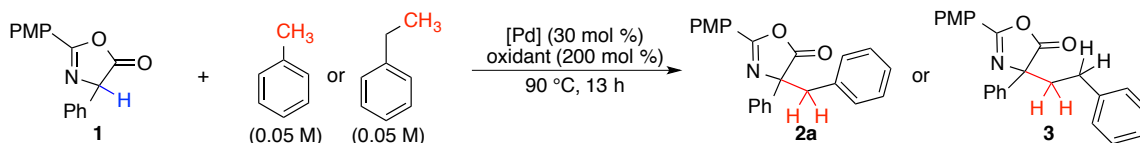

To a 96-well reactor equipped with 1 mL vials was added the indicated oxidant (Table S2, entries 1-18, 0.010 mmol, 50  $\mu\text{L}$  of a 0.2 M solution in toluene) respectively. The solvent was evacuated on a Genevac. To each vial was added **1** (0.005 mmol) and the indicated Pd source (0.0015 mmol) (100  $\mu\text{L}$  of a 0.05 M solution in tolyl analog). Oxidants (Table S2, entries 19-23, 0.010 mmol) were added as liquids to the respective vial. The control reactions were prepared from a solution of **1** (0.005 mmol) and Pd source (0.005 mmol) (100  $\mu\text{L}$  of a 0.05 M solution in tolyl analog) into the respective vial. A parylene stir-bar was added to each vial. The reactor block was sealed, removed from the glovebox and stirred for 13 h on an Alligator tumble stirrer (1000 rpm) at 90 °C. The reactions were quenched *via* dilution with a solution of internal standard (4,4'-bis-*tert*-butyl-biphenyl) in 25% DMSO/MeCN (1.0  $\mu\text{mol}$ , 0.002 M, 500  $\mu\text{L}$ ), and the contents were stirred for 15 minutes. Into a separate 96-well plate LC block was added 700  $\mu\text{L}$  of MeCN and 25  $\mu\text{L}$  of the diluted reaction mixtures. The 96-well plate LC block was sealed with a polypropylene 1 mL cap mat. The reaction mixtures were analyzed (P/IS and dimer/IS) using an Agilent Technologies 1200 series HPLC with a 96 well-plate auto-sampler. Assay conditions: Acquity CORTECS BEH 1.6  $\mu\text{m}$  C18; 50 mm x

2.1 mm; 1 mL/min; MeCN:H<sub>2</sub>O:Ammonium Formate; gradient: 5% MeCN to 99% in 1.5 min, hold to 2.4 min to 5% MeCN at 2.41 min; ESC pos/neg; nebulizer: 700 L/hr; cone gas: 30 L/hr; source 150 °C; desolvation 450 °C; 210 nm: *t<sub>R</sub>* of **2a** = 2.46, **3** = 2.73 and **8** = 2.73 min.

|                     |                      | entry                 | 1                 | 2                 | 3                    | 4                               | 5                              | 6                 | 7                                 | 8                                            | 9                | 10               | 11               | 12                   | 13    | 14  | 15           | 16   | 17   | 18       | 19         | 20       | 21     | 22        | 23   | 24      |
|---------------------|----------------------|-----------------------|-------------------|-------------------|----------------------|---------------------------------|--------------------------------|-------------------|-----------------------------------|----------------------------------------------|------------------|------------------|------------------|----------------------|-------|-----|--------------|------|------|----------|------------|----------|--------|-----------|------|---------|
| <b>Toluene</b>      | Pd(OAc) <sub>2</sub> | P/IS <sup>a</sup>     | 0.0               | 0.0               | 4.5                  | 0.0                             | 0.0                            | 0.8               | 3.1                               | 6.7                                          | 0.9              | 0.0              | 0.0              | 1.9                  | 4.5   | 0.0 | 5.8          | 0.7  | 0.0  | 7.4      | 0.0        | 4.8      | 0.0    | 0.0       | 0.9  | 6.9     |
|                     |                      | Dimer/IS <sup>a</sup> | 0.0               | 0.0               | 1.6                  | 0.0                             | 0.0                            | 0.0               | 0.0                               | 0.0                                          | 0.0              | 0.0              | 0.0              | 0.0                  | 0.0   | 0.0 | 0.0          | 0.0  | 1.4  | 0.0      | 0.0        | 0.0      | 1.2    | 0.0       | 0.0  | 0.0     |
|                     | Pd(TFA) <sub>2</sub> | P/IS <sup>a</sup>     | 0.0               | 0.0               | 0.0                  | 0.0                             | 0.0                            | 0.0               | 3.0                               | 1.8                                          | 2.1              | 0.0              | 0.0              | 1.5                  | 2.7   | 0.0 | 0.0          | 0.0  | 0.5  | 6.2      | 0.0        | 2.7      | 0.0    | 0.1       | 2.5  | 7.0     |
|                     |                      | Dimer/IS <sup>a</sup> | 0.0               | 0.0               | 1.3                  | 0.0                             | 0.0                            | 0.0               | 1.4                               | 1.7                                          | 0.0              | 0.0              | 0.0              | 0.8                  | 0.0   | 0.0 | 2.1          | 0.0  | 0.0  | 0.0      | 0.0        | 0.0      | 0.0    | 0.0       | 0.9  | 0.8     |
| <b>Ethylbenzene</b> | Pd(OAc) <sub>2</sub> | P/IS <sup>a</sup>     | 0.0               | 0.0               | 0.0                  | 0.0                             | 0.0                            | 0.0               | 0.0                               | 4.1                                          | 0.0              | 0.0              | 0.0              | 2.1                  | 1.6   | 0.0 | 1.7          | 0.0  | 0.0  | 1.6      | 0.5        | 4.5      | 0.0    | 0.4       | 0.0  | 7.1     |
|                     |                      | Dimer/IS <sup>a</sup> | 0.0               | 0.0               | 2.1                  | 0.0                             | 0.7                            | 1.0               | 1.8                               | 0.0                                          | 0.0              | 0.0              | 0.0              | 0.9                  | 0.0   | 1.0 | 2.7          | 2.8  | 0.7  | 1.0      | 0.0        | 0.8      | 0.0    | 0.0       | 1.6  | 0.0     |
|                     | Pd(TFA) <sub>2</sub> | P/IS <sup>a</sup>     | 0.7               | 0.0               | 0.0                  | 0.0                             | 0.0                            | 0.0               | 1.1                               | 0.0                                          | 0.7              | 0.0              | 0.0              | 1.3                  | 0.0   | 0.0 | 0.0          | 0.0  | 1.4  | 4.1      | 0.3        | 2.0      | 0.0    | 1.9       | 0.0  | 4.2     |
|                     |                      | Dimer/IS <sup>a</sup> | 0.0               | 0.0               | 1.7                  | 0.0                             | 0.0                            | 0.0               | 1.5                               | 2.2                                          | 0.0              | 0.0              | 0.0              | 1.9                  | 0.7   | 1.2 | 2.3          | 0.9  | 0.0  | 0.0      | 0.4        | 0.0      | 0.0    | 1.0       | 2.8  | 0.7     |
| <b>Oxidant</b>      |                      |                       | CuBr <sub>2</sub> | CuCl <sub>2</sub> | Cu(OAc) <sub>2</sub> | Ag <sub>2</sub> CO <sub>3</sub> | K <sub>3</sub> PO <sub>4</sub> | Ag <sub>2</sub> O | Ce(SO <sub>4</sub> ) <sub>2</sub> | K <sub>2</sub> S <sub>2</sub> O <sub>8</sub> | F <sup>+1b</sup> | F <sup>+2c</sup> | F <sup>+3d</sup> | (PhCOO) <sub>2</sub> | Oxone | NCS | Benzoquinone | PIDA | TBAB | 2,6-DMBQ | Cumene OOH | tBuOOtBu | tBuOOH | tBuOOCOPh | DMSO | control |

<sup>a</sup>Determined by UPLC. <sup>b</sup>F<sup>+1</sup> = 1-fluoropyridinium tetrafluoroborate. <sup>c</sup>F<sup>+2</sup> = 1-fluoro-2,4,6-trimethylpyridinium triflate.

<sup>d</sup>F<sup>+3</sup> = *N*-fluorobenzenesulfonimide.

**Table S3. Optimization of catalytic benzylation.**

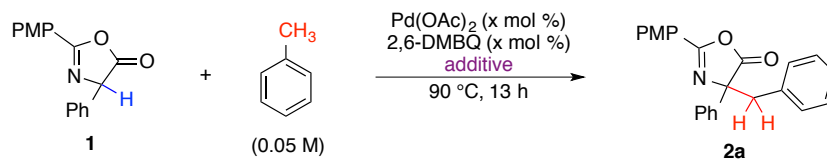

Phenylglycine azlactone **1** (10 mg, 0.038 mmol) was added to a flame dried 8 mL microwave vial equipped with a stirbar and brought into the glovebox. Pd carboxylate was added, followed by 2,6-DMBQ, additive and toluene (750 μL, 0.05 M). The microwave vial was sealed with a Teflon cap, removed from the glovebox, placed in a 95 °C oil bath. After 13 h, the mixture was allowed to cool to ambient temperature, diluted

with CH<sub>2</sub>Cl<sub>2</sub> (1 mL), passed through SiO<sub>2</sub> with 30% EtOAc in hexanes, and concentrated *in vacuo*. The resulting residue was analyzed by <sup>1</sup>H NMR and if necessary purified by column chromatography to afford **2a**. See above for characterization.

| entry | additive (100 mol %) <sup>a</sup> | yield (%) <sup>b</sup> | entry | additive (100 mol %) <sup>c</sup>    | yield (%) <sup>b</sup> |
|-------|-----------------------------------|------------------------|-------|--------------------------------------|------------------------|
| 1     | AcOH                              | 75                     | 4     | MnO <sub>2</sub> <sup>c</sup>        | 70                     |
| 2     | PivOH                             | 84                     | 5     | AcOH, MnO <sub>2</sub> <sup>c</sup>  | 79                     |
| 3     | TfOH                              | 0                      | 6     | PivOH, MnO <sub>2</sub> <sup>c</sup> | mixture <sup>d</sup>   |

<sup>a</sup>Pd(OAc)<sub>2</sub> (10 mol %) and 2,6-DMBQ (100 mol %). <sup>b</sup>Isolated yield. <sup>c</sup>Pd(OAc)<sub>2</sub> (20 mol %), 2,6-DMBQ (20 mol %), MnO<sub>2</sub> (200 mol %). <sup>d</sup>50:50 mixture of P and dimer.

**Table S4. PME screen of co-solvents with optimal catalytic conditions.**

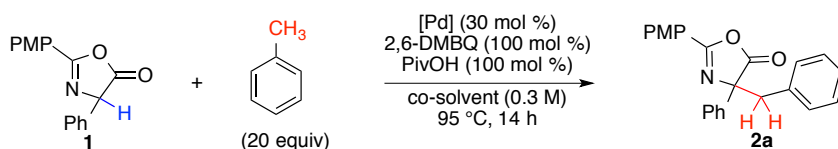

To a 24-well reactor equipped with 1 mL vials was added **1** (0.005 mmol) and 2,6-DMBQ (0.005 mmol) in THF (100 μL of a 0.05 M solution). The solvent was evacuated on a Genevac. A solution of Pd carboxylate (0.0015 mmol) and PivOH (0.005 mmol) (40 μL of a 0.038 M solution in co-solvent) was added to the 24-well reactor respectively. Toluene (22 μL, 0.1 mmol) and a parylene stir-bar were added to each vial. The reactor block was sealed, removed from the glovebox and stirred for 14 h on an Alligator tumble stirrer (1000 rpm) at 95 °C. The reactions were quenched *via* dilution with a solution of internal standard (4,4'-bis-*tert*-butyl-biphenyl) in 25% DMSO/MeCN (1.0 μmol, 0.002 M, 500 μL), and the contents were stirred for 15 minutes. Into a separate 96-well plate LC block was added 700 μL of MeCN and 25 μL of the diluted reaction mixtures. The 96-well plate LC block was sealed with a polypropylene 1 mL cap

mat. The reaction mixtures were analyzed (P/IS and dimer/IS) using an Agilent Technologies 1200 series HPLC with a 96 well-plate auto-sampler. Assay conditions: Supeclo Ascentis Express C18 column 100 mm x 4.6 mm, 1.8  $\mu$ m with reverse phase eluents (MeCN and 0.1 % H<sub>3</sub>PO<sub>4</sub> in H<sub>2</sub>O); 1.8 mL/min; 10 % in MeCN to 95 % MeCN in 6 min, hold for 2 min. Post time 2 min. Column at 40 °C; 210 nm:  $t_R$  of **1** = 4.7, **2a** = 5.9 and **8** = 6.5 min.

| entry <sup>a</sup> | co-solvent (0.3 M)                 | P/IS <sup>b</sup> | (P + dimer)/IS <sup>b</sup> | entry <sup>c</sup> | co-solvent (0.3 M)                 | P/IS <sup>b</sup> | (P + dimer)/IS <sup>b</sup> |
|--------------------|------------------------------------|-------------------|-----------------------------|--------------------|------------------------------------|-------------------|-----------------------------|
| 1                  | DMF                                | 0.53              | 0.53                        | 7                  | DMF                                | 0.20              | 0.79                        |
| 2                  | NMP                                | 0.73              | 0.79                        | 8                  | NMP                                | 0.61              | 0.81                        |
| 3                  | 1,4-dioxane                        | 2.24              | 4.26                        | 9                  | 1,4-dioxane                        | 1.87              | 2.92                        |
| 4                  | 2-butanol                          | 0.80              | 1.44                        | 10                 | 2-butanol                          | 1.12              | 1.12                        |
| 3                  | diglyme                            | 0.34              | 2.14                        | 11                 | diglyme                            | 0.86              | 2.25                        |
| 4                  | MeCO <sub>2</sub> <sup>i</sup> -Pr | 0.87              | 2.54                        | 12                 | MeCO <sub>2</sub> <sup>i</sup> -Pr | 1.08              | 1.85                        |

<sup>a</sup>[Pd] = Pd(OAc)<sub>2</sub>. <sup>b</sup>Determined by HPLC. <sup>c</sup>[Pd] = Pd(TFA)<sub>2</sub>.

### KIE Studies: d<sub>8</sub>-toluene (Scheme 5)

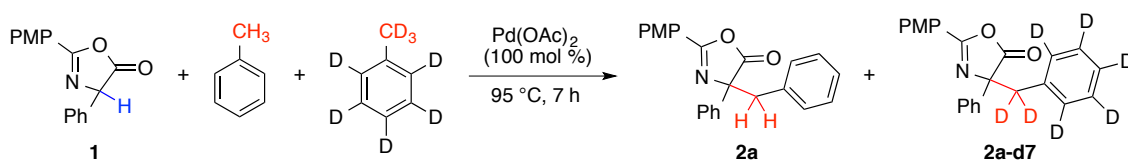

Phenylglycine azlactone **1** (10 mg, 0.038 mmol) was added to a flame dried 8 mL microwave vial equipped with stir bar and brought into the glovebox. Pd(OAc)<sub>2</sub> (8.4 mg, 0.038 mmol) was added followed by toluene (138  $\mu$ L, 1.5 mmol) and d<sub>8</sub>-toluene (150  $\mu$ L, 1.5 mmol). The microwave vial was sealed with a Teflon cap, removed from the glovebox and placed in a 95 °C oil bath. After 7 h, the mixture was allowed to cool to

ambient temperature, diluted with CH<sub>2</sub>Cl<sub>2</sub> (1 mL), passed through SiO<sub>2</sub> with 30% EtOAc in hexanes, and concentrated *in vacuo*. The resulting residue was purified by column chromatography (7% EtOAc in hexanes) to afford a mixture of **2a** and **2a-d7** (12 mg) in 89% yield. Two trials were conducted and the  $k_H/k_D = 3.4 \pm 0.15$ . <sup>1</sup>H NMR (500 MHz, CDCl<sub>3</sub>) δ 7.86 (d, *J* = 8.7 Hz, 2H), 7.78 (d, *J* = 8.0 Hz, 2H), 7.40 (t, *J* = 7.7 Hz, 2H), 7.34 (t, *J* = 7.3 Hz, 1H), 7.22-7.11 (m, 3.8H), 6.93 (d, *J* = 8.9 Hz, 2H), 3.86 (s, 3H), 3.51 (d, *J* = 13.4 Hz, 0.74H), 3.44 (d, *J* = 13.4 Hz, 0.77H).

### KIE Studies: d<sub>3</sub>-toluene (Scheme 5)

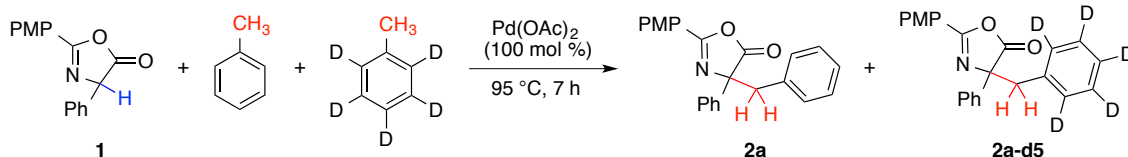

Phenylglycine azlactone **1** (27 mg, 0.1 mmol) was added to a flame dried 8 mL microwave vial equipped with stir bar and brought into the glovebox. Pd(OAc)<sub>2</sub> (23 mg, 0.1 mmol) was added followed by toluene (319 μL, 3.0 mmol) and d<sub>5</sub>-toluene (336 μL, 3.0 mmol). The microwave vial was sealed with a Teflon cap, removed from the glovebox and placed in a 95 °C oil bath. After 7 h, the mixture was allowed to cool to ambient temperature, diluted with CH<sub>2</sub>Cl<sub>2</sub> (1 mL), passed through SiO<sub>2</sub> with 30% EtOAc in hexanes, and concentrated *in vacuo*. The resulting residue was purified by column chromatography (7% EtOAc in hexanes) to afford a mixture of **2a** and **2a-d5** (19 mg) in 53% yield with  $k_H/k_D = 1.08$ . <sup>1</sup>H NMR (500 MHz, CDCl<sub>3</sub>) 7.87 (d, *J* = 8.9 Hz, 2H), 7.79 (d, *J* = 7.5 Hz, 2H), 7.41-7.34 (m, 3H), 7.21-7.15 (m, 2.6H), 6.93 (d, *J* = 8.8 Hz, 2H), 3.86 (s, 3H), 3.52 (d, *J* = 13.4 Hz, 1H), 3.45 (d, *J* = 13.4 Hz, 1H).



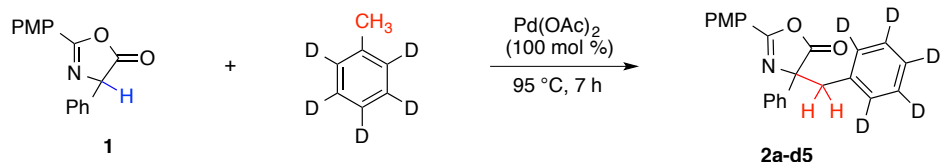

Phenylglycine azlactone **1** (7.0 mg, 0.026 mmol) and Pd(OAc)<sub>2</sub> (6.0 mg, 0.026 mmol) were added to a flame dried 8 mL microwave vial equipped with a stirbar and brought into the glovebox. d<sub>5</sub>-Toluene (200 μL, 2.0 mmol) was added to the mixture. The microwave vial was sealed with a Teflon cap, removed from the glovebox, and placed in a 95 °C oil bath. After 7 h, the mixture was allowed to cool to ambient temperature, diluted with CH<sub>2</sub>Cl<sub>2</sub> (1 mL), passed through SiO<sub>2</sub> with 30% EtOAc in hexanes, and concentrated *in vacuo*. The resulting residue was purified by column chromatography (7% EtOAc in hexanes) to afford a mixture of **2a-d5** (9 mg) in 98% yield. <sup>1</sup>H NMR (500 MHz, CDCl<sub>3</sub>) δ 7.87 (d, *J* = 8.5 Hz, 2H), 7.78 (d, *J* = 8.1 Hz, 2H), 7.41 (t, *J* = 7.6 Hz, 2H), 7.34 (t, *J* = 7.3 Hz, 1H), 6.93 (d, *J* = 8.5 Hz, 2H), 3.86 (s, 3H), 3.51 (d, *J* = 13.4 Hz, 1H), 3.44 (d, *J* = 13.4 Hz, 1H).

### Deuterium scrambling with ethylbenzene (eq 5)

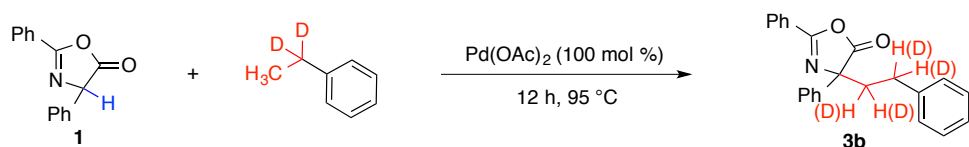

Phenylglycine azlactone **1** (10 mg, 0.038 mmol) and Pd(OAc)<sub>2</sub> (9.5 mg, 0.038 mmol) were added to a flame dried 8 mL microwave vial equipped with a stirbar and brought into the glovebox. d<sub>2</sub>-Ethylbenzene (700 μL, 5.7 mmol) was added to the mixture. The microwave vial was sealed with a Teflon cap, removed from the glovebox

and placed in a 95 °C oil bath. After 12 h, the mixture was allowed to cool to ambient temperature, diluted with CH<sub>2</sub>Cl<sub>2</sub> (1 mL), passed through SiO<sub>2</sub> with 30% EtOAc in hexanes, and concentrated *in vacuo*. The resulting residue was purified by column chromatography (7% EtOAc in hexanes) to afford **3b** (3.1 mg) in 22% yield: <sup>1</sup>H NMR matched spectrum above for **3** but the peaks at 2.66-2.58 (m, 2H) and 2.56-2.43 (m, 2H) were observed as 2.66-2.56 (m, 0.75H) and 2.56-2.43 (m, 1.24H) corresponding to 38% and 62% H incorporation respectively. This experiment was repeated with general procedure B and the <sup>1</sup>H NMR matched spectrum above for **3** but the peaks at 2.66-2.58 (m, 2H) and 2.56-2.43 (m, 2H) were observed as 2.66-2.56 (m, 0.8H) and 2.56-2.43 (m, 1.4H) corresponding to 40% and 70% H incorporation respectively.

### Radical studies with ethylbenzene (Table 2)

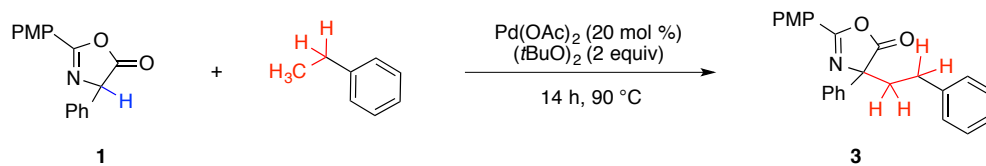

Phenylglycine azlactone **1** (11.2 mg, 0.042 mmol) and Pd(OAc)<sub>2</sub> (1.9 mg, 0.008 mmol) were added to a flame dried 8 mL microwave vial equipped with a stirbar, and brought into the glovebox. A solution of di-*tert*-butylperoxide (*t*-BuO)<sub>2</sub> in ethylbenzene (855 μL, 0.1 M) was added to the mixture. The microwave vial was sealed with a Teflon cap, removed from the glovebox and placed in a 90 °C oil bath. After 14 h, the mixture was allowed to cool to ambient temperature, diluted with CH<sub>2</sub>Cl<sub>2</sub> (1 mL), passed through SiO<sub>2</sub> with 30% EtOAc in hexanes, and concentrated *in vacuo*. The resulting residue was

purified by column chromatography (7% EtOAc in hexanes) to afford **3** (5.9 mg) in 38% yield. The remaining product was phenylglycine azlactone dimer. See above for characterization.

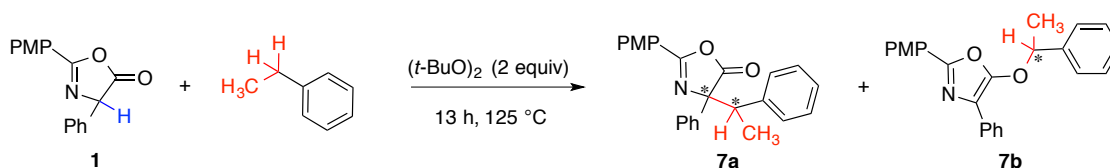

Phenylglycine azlactone **1** (60 mg, 0.23 mmol) was added to a flame dried 8 mL microwave vial equipped with a stirbar, and brought into the glovebox. A solution of (*t*-BuO)<sub>2</sub> in ethylbenzene (4.58 mL, 0.1 M) was added. The microwave vial was sealed with a Teflon cap, removed from the glovebox and placed in a 125 °C oil bath. After 13 h, the mixture was allowed to cool to ambient temperature, diluted with CH<sub>2</sub>Cl<sub>2</sub> (2 mL), passed through SiO<sub>2</sub> with 30% EtOAc in hexanes, and concentrated *in vacuo*. The resulting residue was purified by column chromatography (15% EtOAc in hexanes) to afford a 9:1 inseparable mixture of **7a** and **7b** (50 mg) in 60% yield. This mixture which consisted of six isomers of **7a** and **7b** was further analyzed in a collaboration with Erik Regalado and Christopher Welch at Merck Research Laboratories, Rahway, NJ.<sup>2</sup>

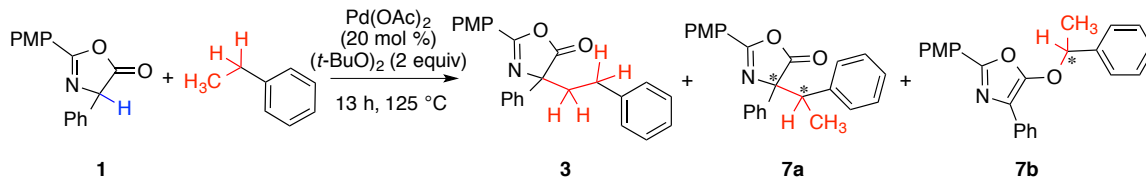

Phenylglycine azlactone **1** (11.2 mg, 0.042 mmol) and Pd(OAc)<sub>2</sub> (1.9 mg, 0.008 mmol) were added to a flame dried 8 mL microwave vial equipped with a stirbar, and brought into the glovebox. A solution of (*t*-BuO)<sub>2</sub> in ethylbenzene (855 μL, 0.1 M) was

added to the mixture. The microwave vial was sealed with a Teflon cap, removed from the glovebox and placed in a 125 °C oil bath. After 13 h, the mixture was allowed to cool to ambient temperature, diluted with CH<sub>2</sub>Cl<sub>2</sub> (1 mL), passed through SiO<sub>2</sub> with 30% EtOAc in hexanes, and concentrated *in vacuo*. The resulting residue was purified by column chromatography (7% EtOAc in hexanes) to afford a 1:8:1 mixture of **3**, **7a**, and **7b**.

**Table S5. Radical scavengers study.**

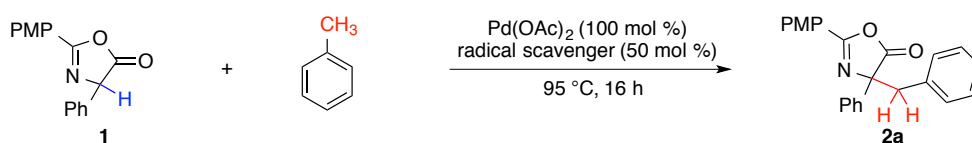

Phenylglycine azlactone **1** (10 mg, 0.037 mmol) and radical scavenger (0.019 mmol) were added to a flame dried 8 mL microwave vial equipped with a stirbar and brought into the glovebox. Pd(OAc)<sub>2</sub> (8.3 mg, 0.037 mmol) was added followed by toluene (370 μL, 3.7 mmol). The microwave vial was sealed with a Teflon cap, removed from the glovebox, and placed in a 95 °C oil bath. After 16 h, the mixture was allowed to cool to ambient temperature, diluted with CH<sub>2</sub>Cl<sub>2</sub> (1 mL), passed through SiO<sub>2</sub> with 30% EtOAc in hexanes, and concentrated *in vacuo*. The resulting residue was purified by column chromatography (7% EtOAc in hexanes) to afford **2a**. See above for characterization.

| entry | radical scavenger (50 mol %) | yield (%) | recovered scavenger (%) |
|-------|------------------------------|-----------|-------------------------|
| 1     | TEMPO                        | 54        | 0                       |
| 2     | 1,1-diphenylethylene         | 85        | 58                      |
| 3     | BHT                          | 59        | 67                      |
| 4     | none                         | 83        | -                       |

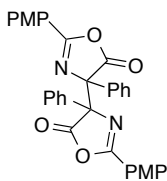

**2,2'-bis(4-methoxyphenyl)-4,4'-diphenyl-[4,4'-bioxazole]-5,5'-(4H,4'H)-dione (8).**

Phenylglycine azlactone **1** (60 mg, 0.23 mmol), Pd(OAc)<sub>2</sub> (2.5 mg, 0.011 mmol) and Ag<sub>2</sub>O (52 mg, 0.23 mmol) were added to a flame dried 8 mL microwave vial equipped with a stirbar and brought into the glovebox. Toluene (2.3 mL, 0.1 M) was added to the mixture. The microwave vial was sealed with a Teflon cap, removed from the glovebox and allowed to stir at ambient temperature. After 5 h, the mixture was purified directly by column chromatography (20% EtOAc in hexanes) to afford **8** (50 mg) in 83% yield as a white solid. A single crystal for X-ray structural analysis was obtained by slow-evaporation from CH<sub>2</sub>Cl<sub>2</sub>. <sup>1</sup>H NMR (500 MHz, CDCl<sub>3</sub>) δ major: 7.88 (d, *J* = 8.7 Hz, 2H), 7.44 (d, *J* = 7.6 Hz, 2H), 7.20 (m, 3H), 6.85 (d, *J* = 8.7 Hz, 2H), 3.82 (s, 3H); minor: 7.9.4 (d, *J* = 8.7 Hz, 2H), 7.69 (d, *J* = 7.6 Hz, 2H), 7.30 (m, 3H), 6.90 (d, *J* = 8.7 Hz, 2H), 3.87 (s, 3H). Spectral data matched those reported previously by Marquez.<sup>3</sup>

**Dimer with catalytic Pd (Scheme 6)**

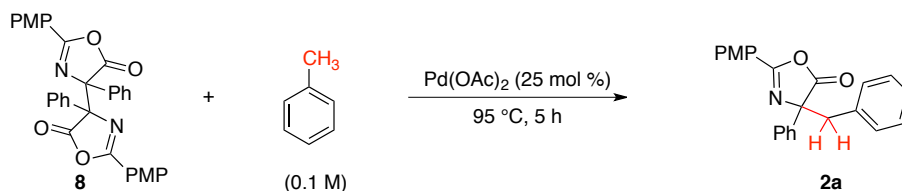

Phenylglycine azlactone dimer **8** (10.0 mg, 0.019 mmol) and Pd(OAc)<sub>2</sub> (1.1 mg, 0.0049 mmol) were added to a flame dried 8 mL microwave vial equipped with a stirbar,

and brought into the glovebox. Toluene (375  $\mu\text{L}$ , 0.1 M) was added to the mixture. The microwave vial was sealed with a Teflon cap, removed from the glovebox and placed in a 95  $^{\circ}\text{C}$  oil bath. After 5 h, the mixture was allowed to cool to ambient temperature, diluted with  $\text{CH}_2\text{Cl}_2$  (1 mL), passed through  $\text{SiO}_2$  with 30% EtOAc in hexanes, and concentrated *in vacuo*. The resulting residue was purified by column chromatography (7% EtOAc in hexanes) to afford **2a** (9.5 mg) in 72% yield. See above for characterization.

### Dimer with $\text{Pd}(\text{TFA})_2$ complex (Scheme 6)

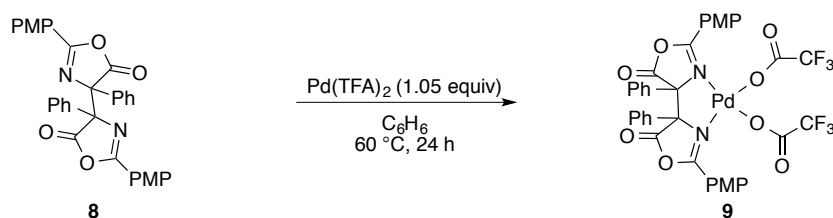

Phenylglycine azlactone dimer **8** (25 mg, 0.047 mmol) and  $\text{Pd}(\text{TFA})_2$  (17.4 mg, 0.0052 mmol) were added to an NMR tube equipped with a J Young valve. The reaction mixture was put under argon and  $\text{C}_6\text{D}_6$  (524  $\mu\text{L}$ , 0.1 M), that had been sparged with argon, was added. The NMR tube was sealed and placed in a 60  $^{\circ}\text{C}$  oil bath. After 24 h, the mixture was allowed to cool to ambient temperature, the reaction mixture was decanted from the black precipitate formed during heating and concentrated *in vacuo*. A single crystal for X-ray structural analysis was obtained by dissolving the resulting residue in THF, layering hexanes on top and storing the mixture in a -8  $^{\circ}\text{C}$  freezer overnight.  $^1\text{H}$  NMR (500 MHz,  $\text{CDCl}_3$ )  $\delta$  9.53 (d,  $J = 7.9$  Hz, 2H), 7.94 (d,  $J = 9.0$  Hz, 2H), 7.32 (t,  $J = 8.0$  Hz, 2H), 6.90 (t,  $J = 7.5$  Hz, 1H), 6.41 (d,  $J = 9.2$  Hz, 2H), 3.00 (s, 3H).

## Dimer-Pd complex with toluene (Scheme 6)

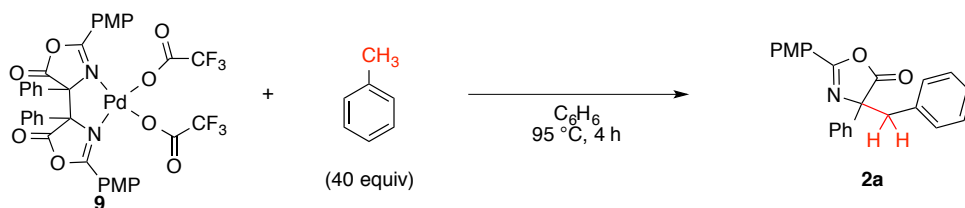

Phenylglycine azlactone dimer **9** (8 mg, 0.015 mmol) and Pd(TFA)<sub>2</sub> (5.5 mg, 0.017 mmol) were added to an NMR tube equipped with a J Young valve. The reaction mixture was put under argon and C<sub>6</sub>D<sub>6</sub> (524 μL, 0.1 M), that had been sparged with argon, was added. The NMR tube was sealed and placed in a 60 °C oil bath. After 24 h, the mixture was allowed to cool to ambient temperature, toluene (165 μL, 0.1 M) was added and the mixture was placed in a 95 °C oil bath. After 4 h, the mixture was allowed to cool to ambient temperature and purified directly by column chromatography (7% EtOAc in hexanes) to afford **2a** (4.0 mg) in 37% yield. See above for characterization.

## Scheme S1. Dimer crossover experiment.

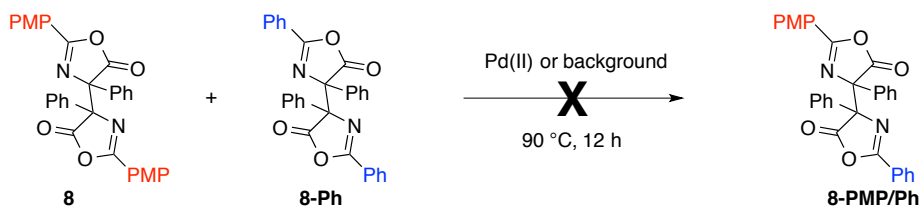

Phenylglycine azlactone dimer **8** (6.3 mg, 0.012 mmol), phenylglycine azlactone dimer **8-Ph** (5.6 mg, 0.012 mmol) and additive [Pd(OAc)<sub>2</sub> (5.4 mg, 0.024 mmol) or no additive] was added to a flame dried 8 mL microwave vial equipped with stir bar, and brought into the glovebox. To each mixture, benzene (240 μL, 0.1 M) was added. The microwave vial was sealed with a Teflon cap, removed from the glovebox and placed in an 90 °C oil bath. After 12 h, each mixture was allowed to cool to ambient temperature, diluted with CH<sub>2</sub>Cl<sub>2</sub> (1 mL), purified directly by column chromatography (15% EtOAc in hexanes) to afford only recovered **8** and **8-Ph**. Analysis by UPLC MS suggested dimer mixing but further investigation with a control (**8** and **8-Ph** mixed together at rt and analyzed) revealed ionization causes mixing during the MS analysis.



---

References:

- 1) Au(OAc)<sub>3</sub>, Cu(OAc)<sub>2</sub>, Rh<sub>2</sub>(OAc)<sub>4</sub> and Ni(OAc)<sub>2</sub> were available from commercial sources. [Pt<sub>4</sub>(OAc)<sub>8</sub>]•HOAc was synthesized following a known procedure, see: Basato, M.; Biffis, A.; Martinati, G.; Tubaro, C.; Venzo, A.; Ganis, P.; Benetolo, F. *Inorg. Chim. Acta* **2003**, 355, 399.
- 2) Regalado, E. L.; Kozlowski, M. C.; Curto, J. M.; Ritter, T.; Campbell, M. G.; Mazzotti, A. R.; Hamper, B. C.; Spilling, C. D.; Mannino, M. P.; Wan, L.; Yu, J.-Q.; Liu, J.; Welch, C. J. *Org. Biomol. Chem.* **2014**, 12, 2161.
- 3) Rodriguez, H.; Marquez, A.; Chuaqui, C. A.; Gomez, B. *Tetrahedron* **1991**, 47, 5681.

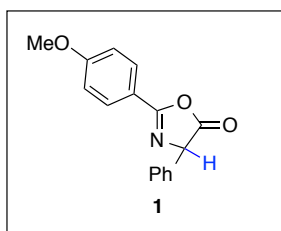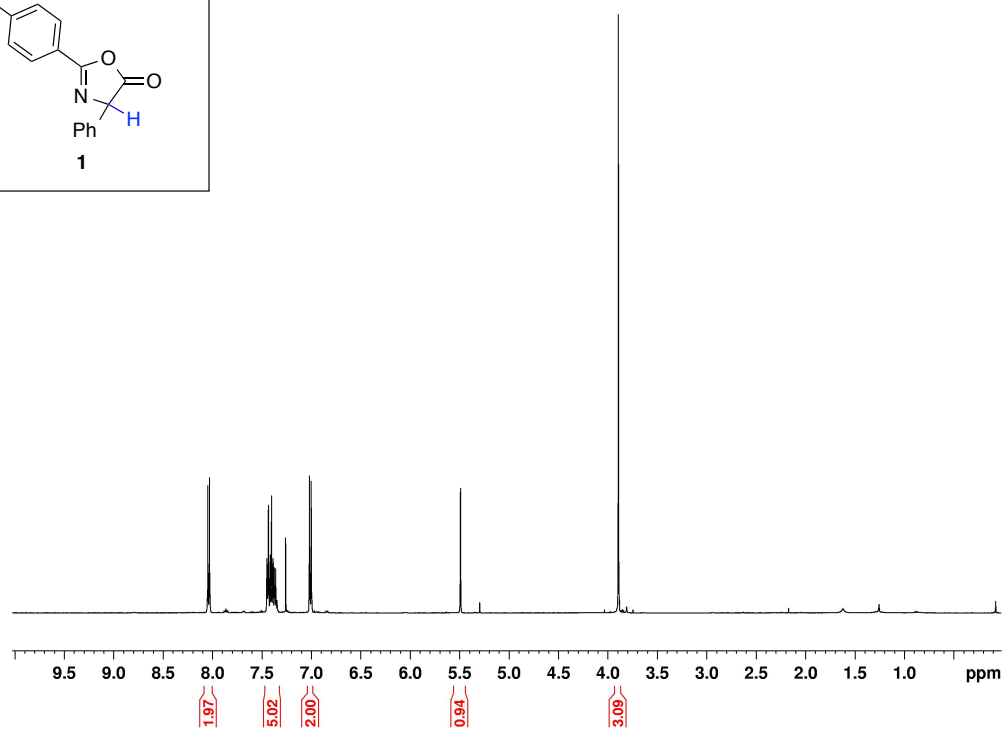

$^1\text{H}$  NMR spectrum of compound **1** (500 MHz,  $\text{CDCl}_3$ )

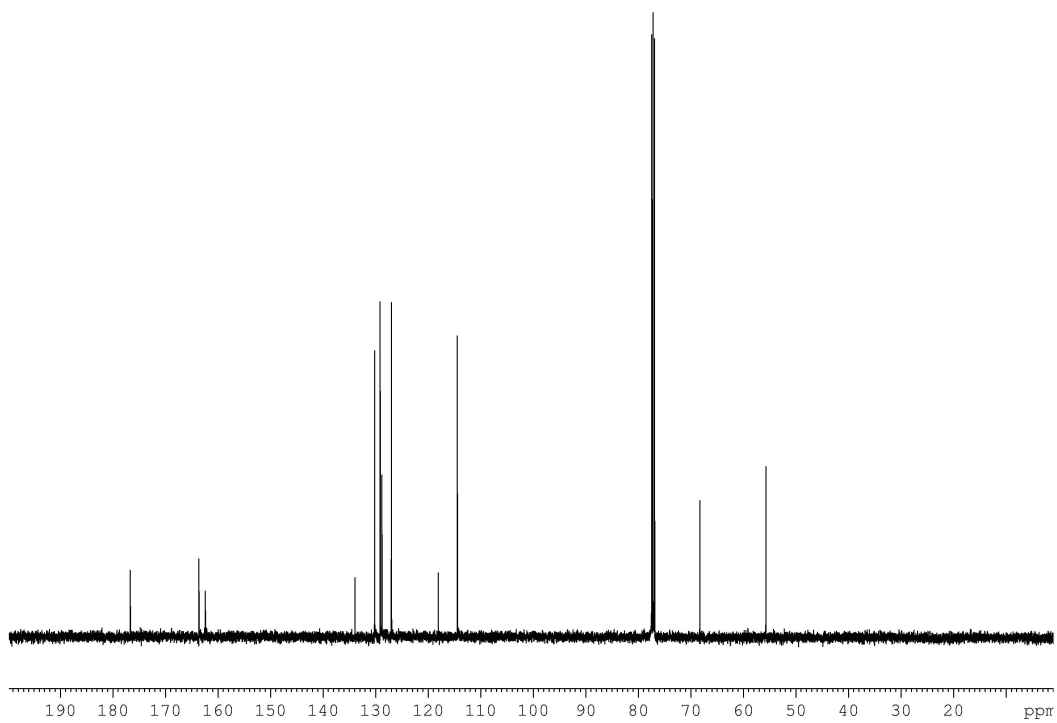

$^{13}\text{C}$  NMR spectrum of compound **1** (125 MHz,  $\text{CDCl}_3$ )

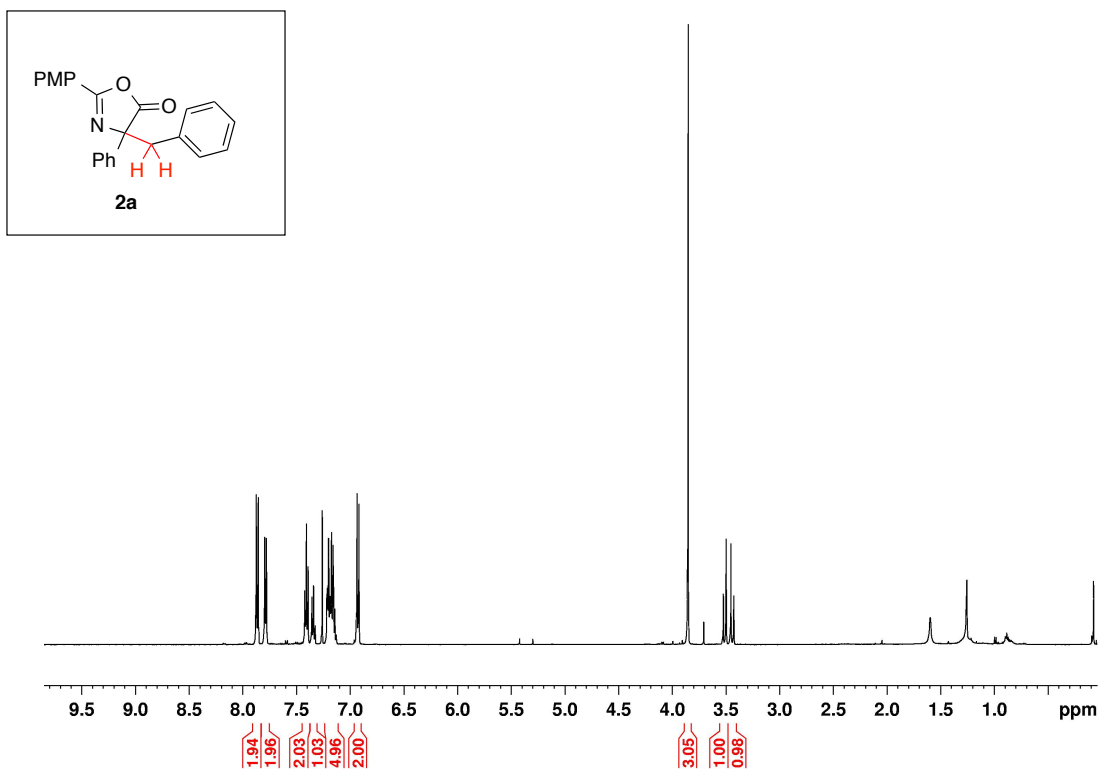

**Scheme 2.** <sup>1</sup>H NMR spectrum of compound **2a** (500 MHz, CDCl<sub>3</sub>)

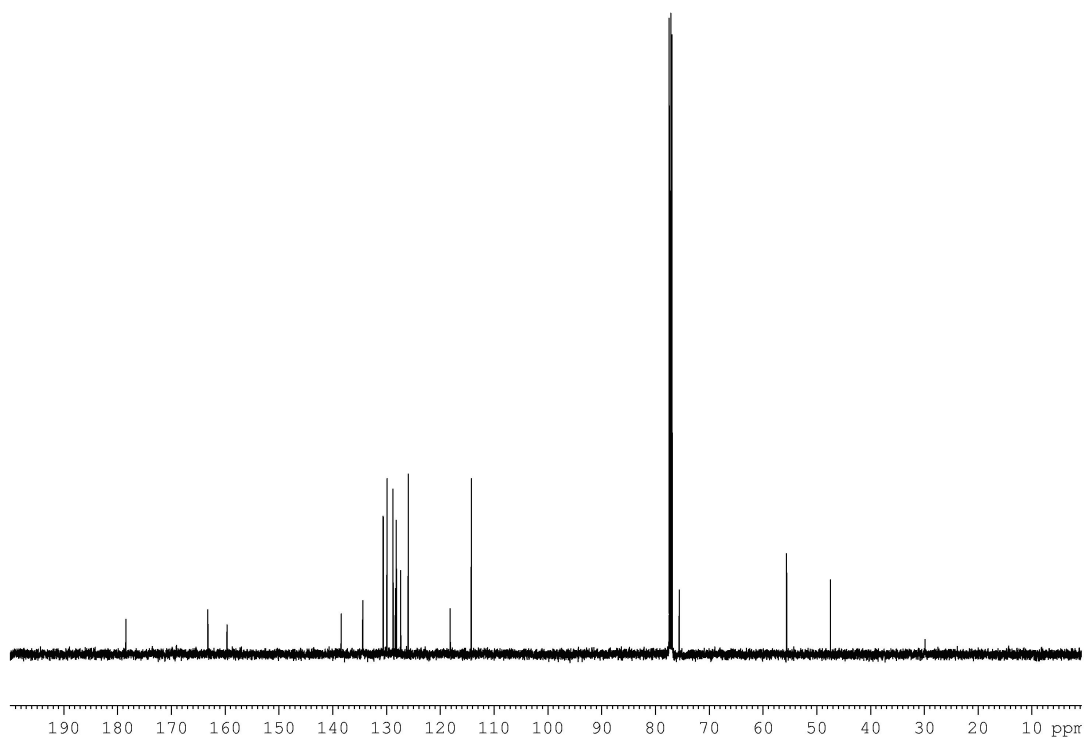

**Scheme 2** <sup>13</sup>C NMR spectrum of compound **2a** (125 MHz, CDCl<sub>3</sub>)

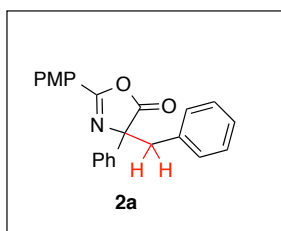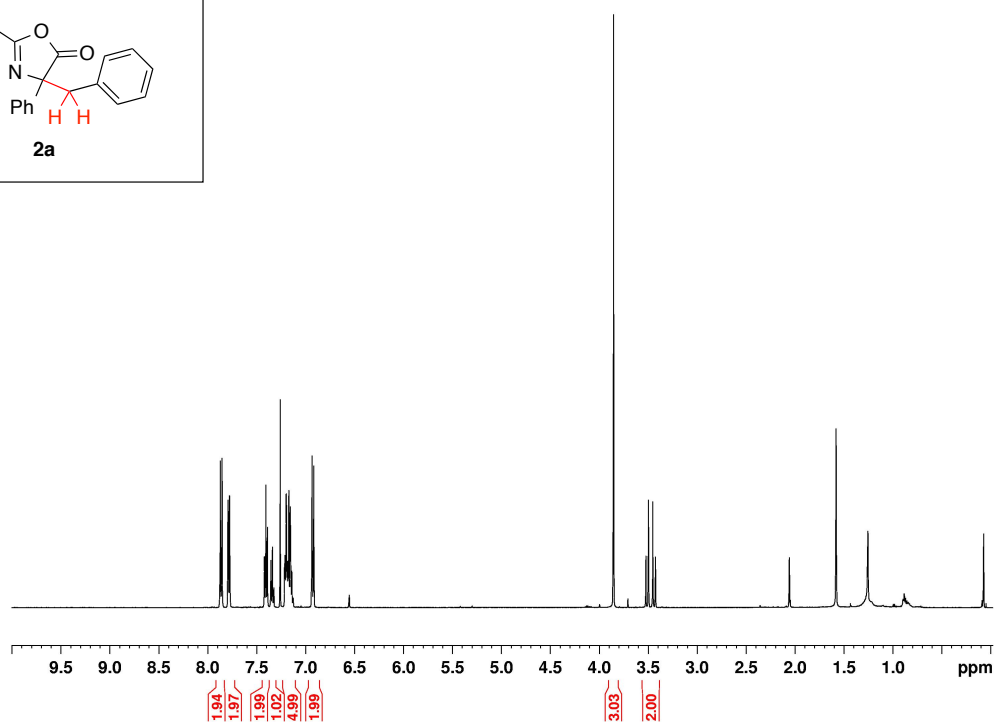

**Scheme 4.**  $^1\text{H}$  NMR spectrum of compound **2a** (500 MHz,  $\text{CDCl}_3$ )

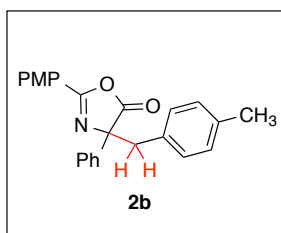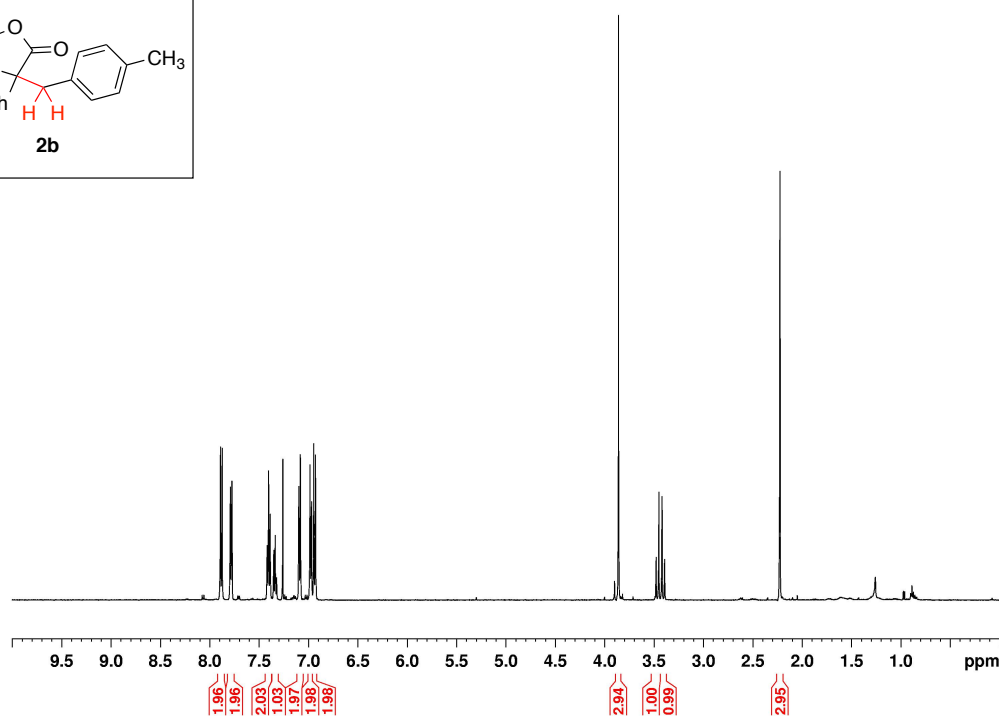

**Scheme 2.**  $^1\text{H}$  NMR spectrum of compound **2b** (500 MHz,  $\text{CDCl}_3$ )

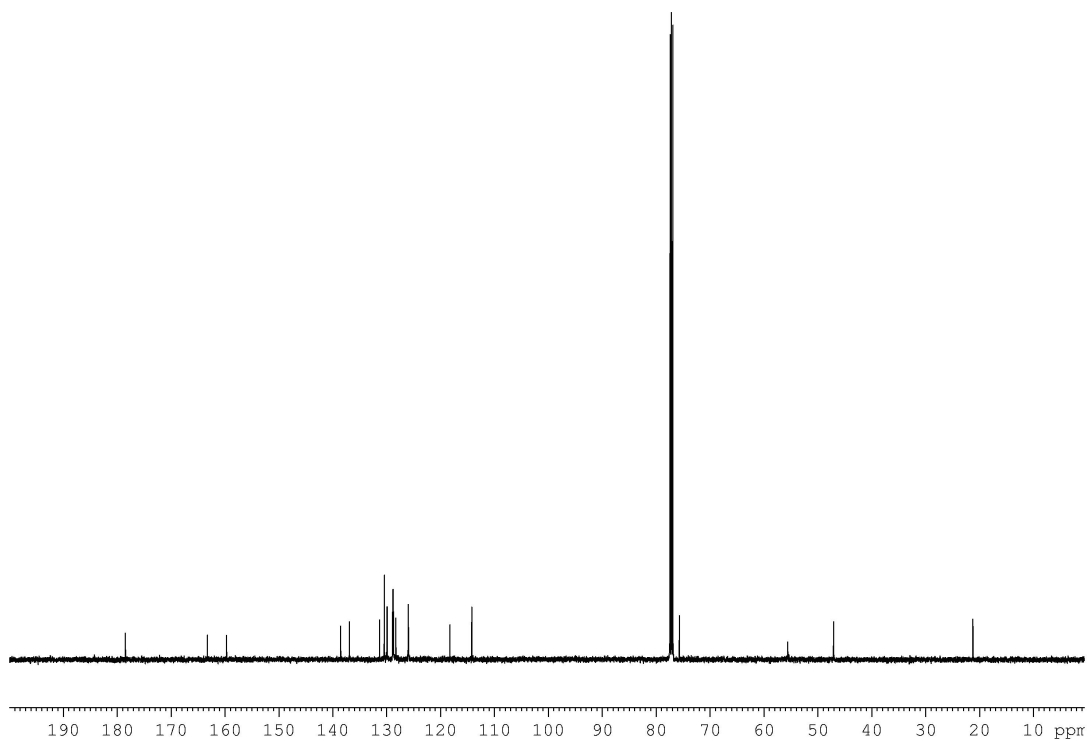

**Scheme 2.**  $^{13}\text{C}$  NMR spectrum of compound **2b** (125 MHz,  $\text{CDCl}_3$ )

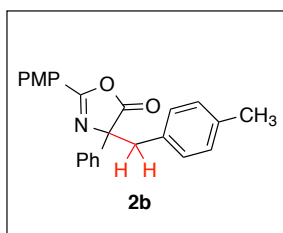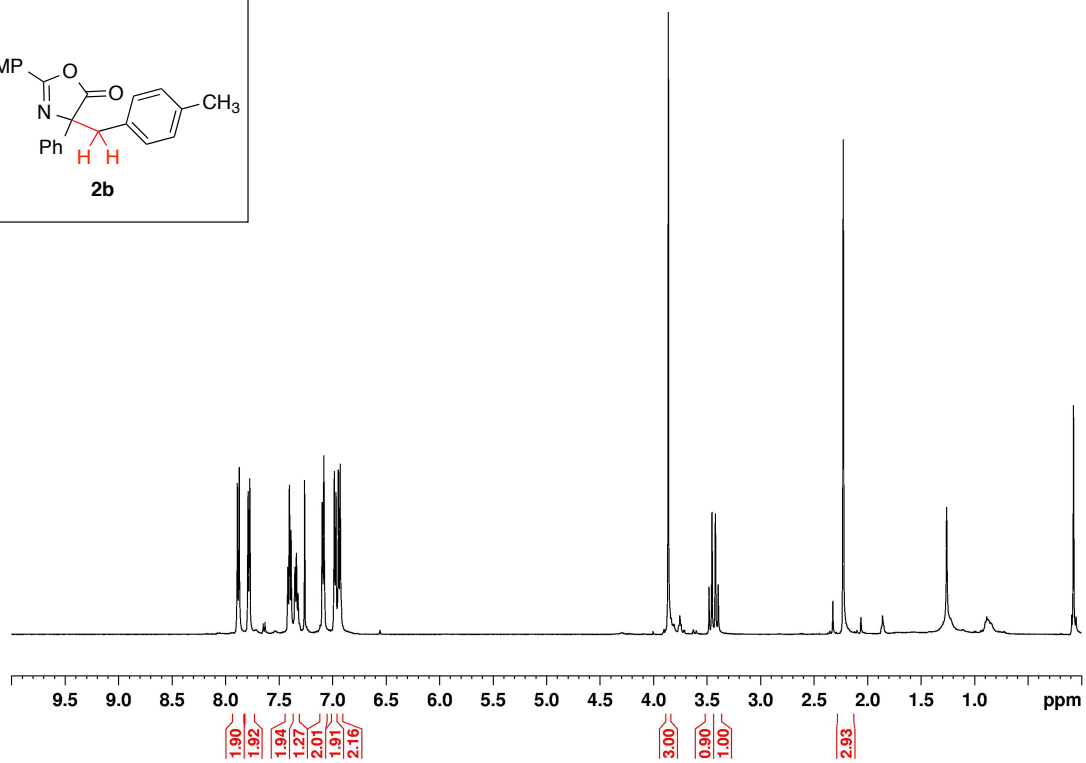

**Scheme 4.** <sup>1</sup>H NMR spectrum of compound **2b** (500 MHz, CDCl<sub>3</sub>)

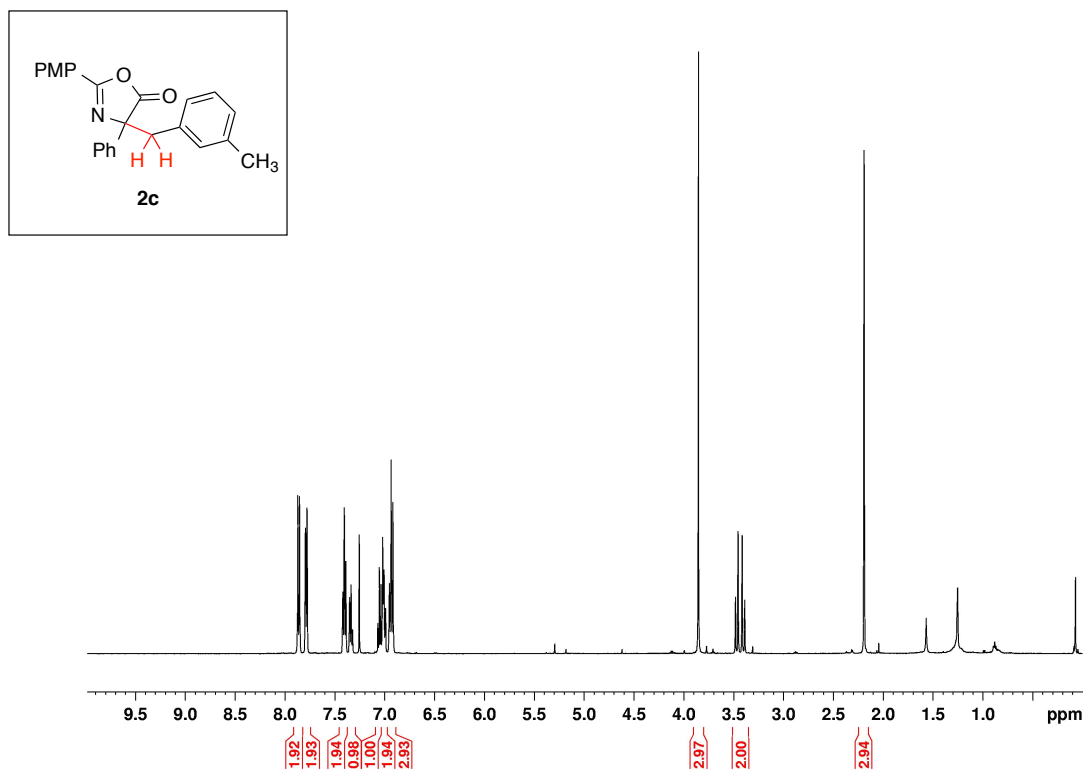

**Scheme 2.** <sup>1</sup>H NMR spectrum of compound **2c** (500 MHz, CDCl<sub>3</sub>)

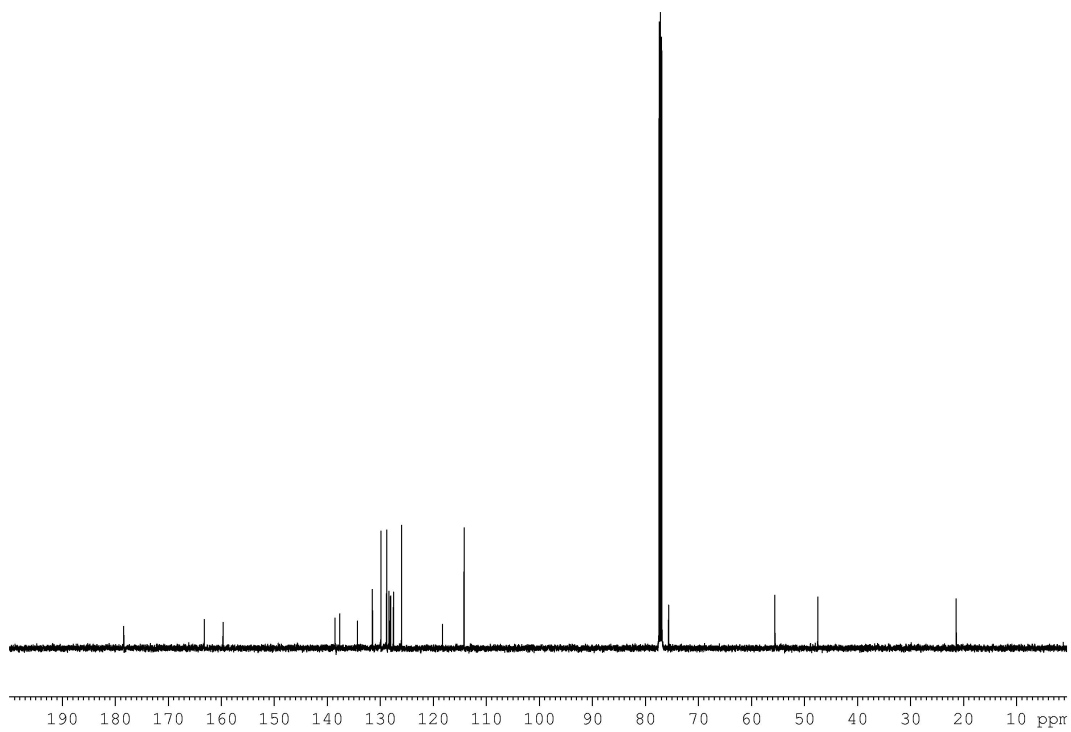

**Scheme 2.** <sup>13</sup>C NMR spectrum of compound **2c** (125 MHz, CDCl<sub>3</sub>)

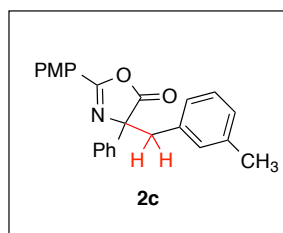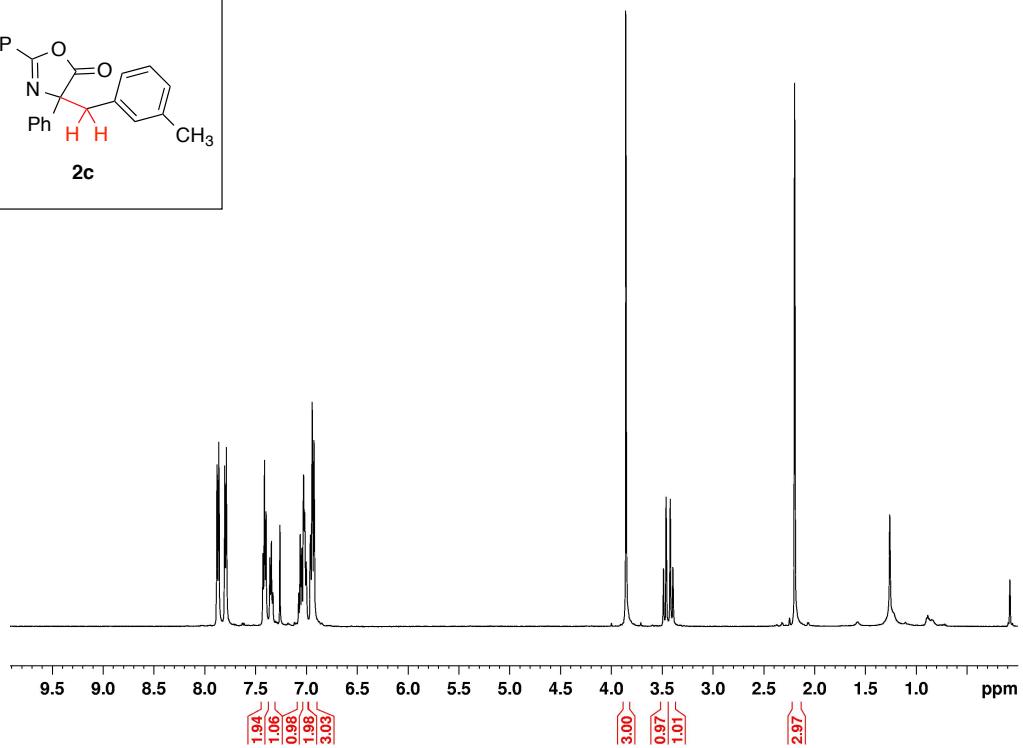

**Scheme 4.** <sup>1</sup>H NMR spectrum of compound **2c** (500 MHz, CDCl<sub>3</sub>)



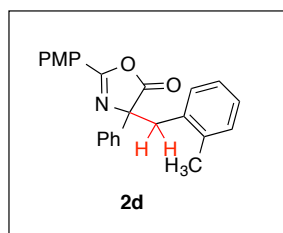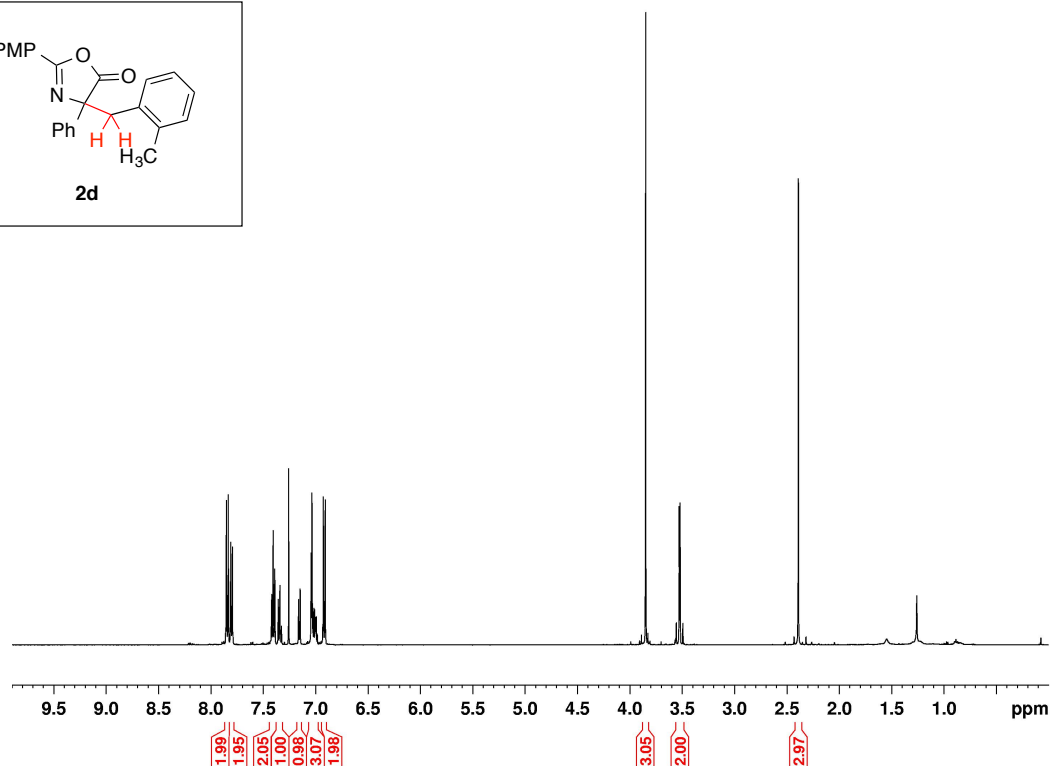

**Scheme 2.** <sup>1</sup>H NMR spectrum of compound **2d** (500 MHz, CDCl<sub>3</sub>)

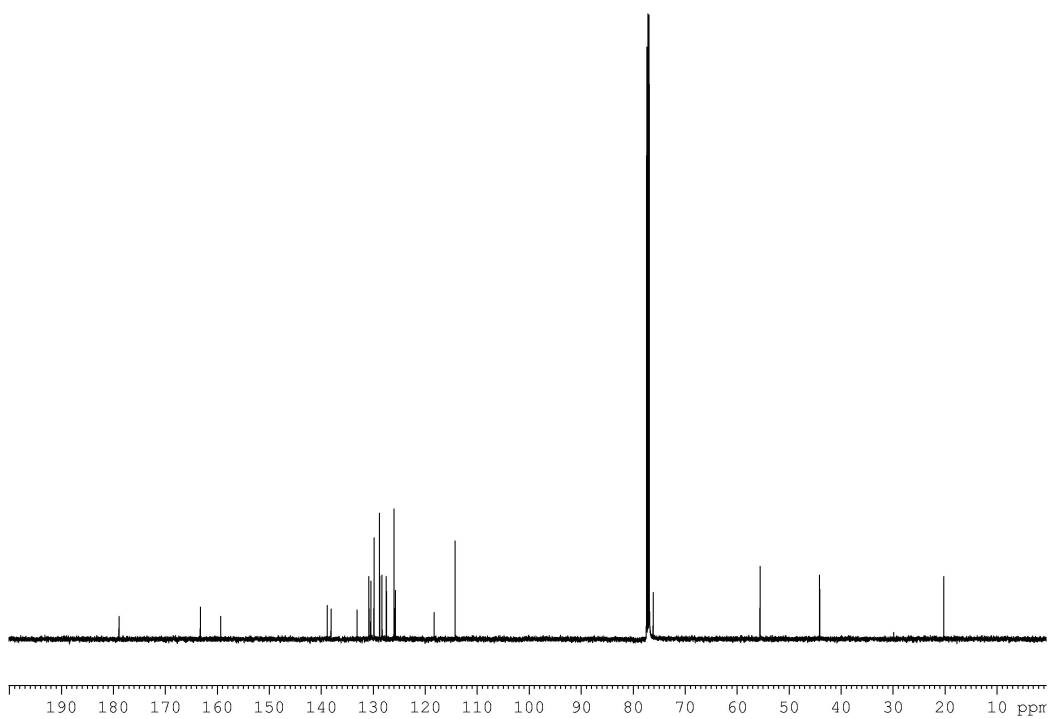

**Scheme 2.** <sup>13</sup>C NMR spectrum of compound **2d** (125 MHz, CDCl<sub>3</sub>)

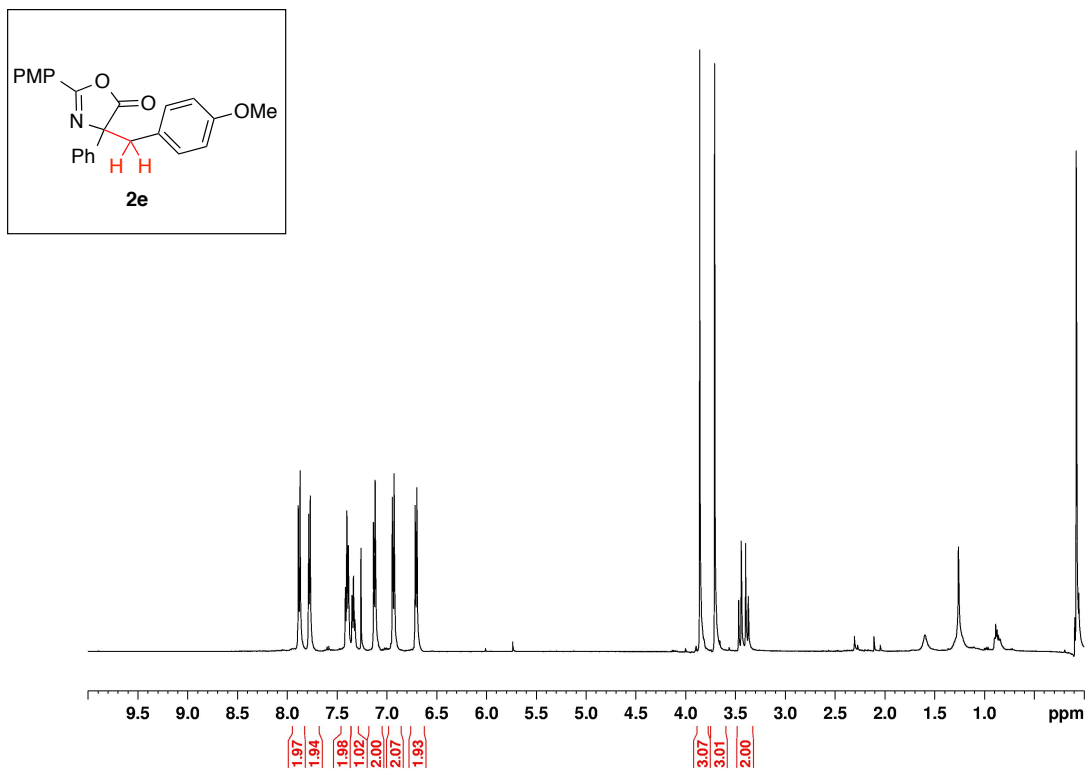

**Scheme 2.**  $^1\text{H}$  NMR spectrum of compound **2e** (500 MHz,  $\text{CDCl}_3$ )

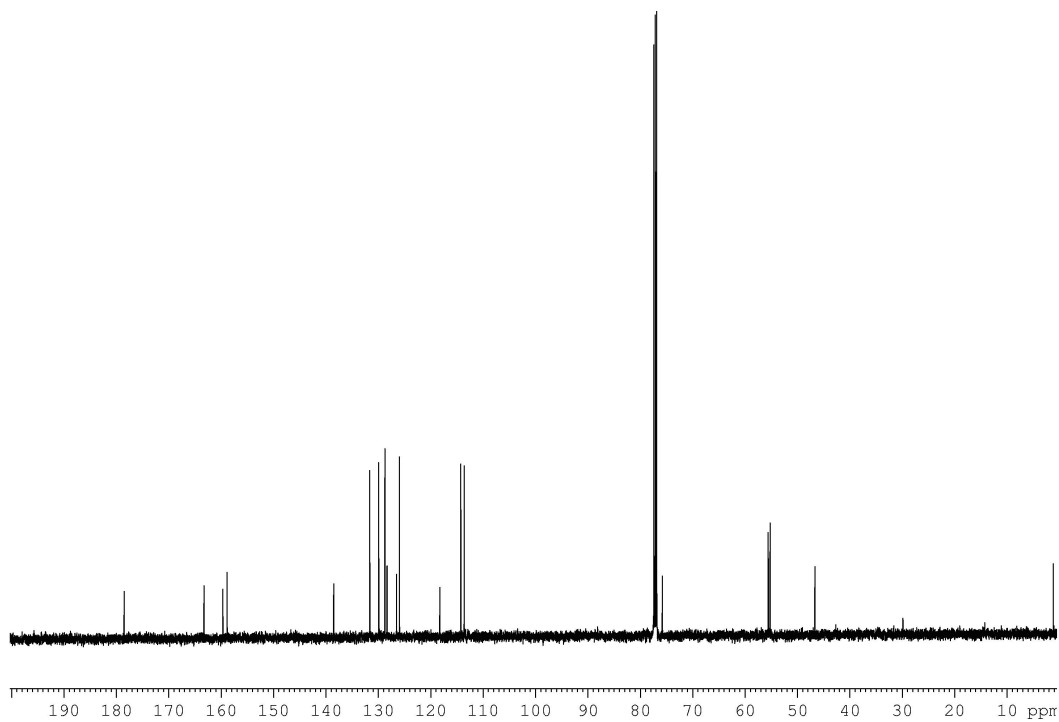

**Scheme 2.**  $^{13}\text{C}$  NMR spectrum of compound **2e** (125 MHz,  $\text{CDCl}_3$ )

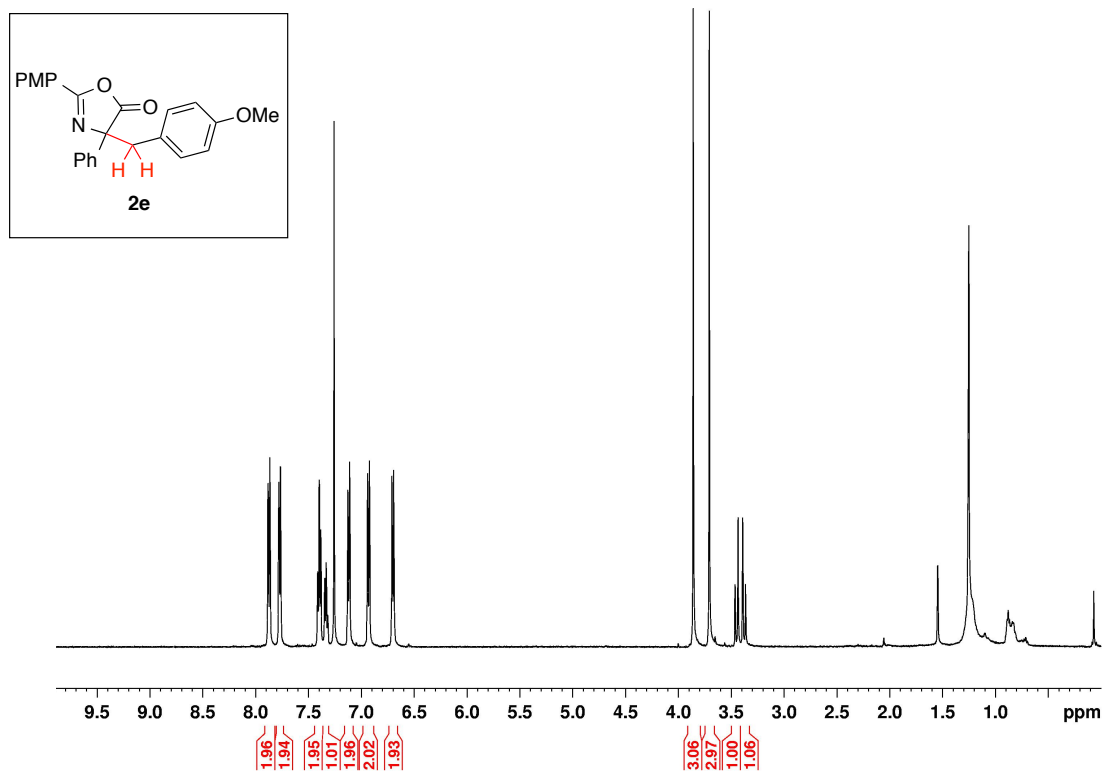

**Scheme 4.** <sup>1</sup>H NMR spectrum of compound **2e** (500 MHz, CDCl<sub>3</sub>)

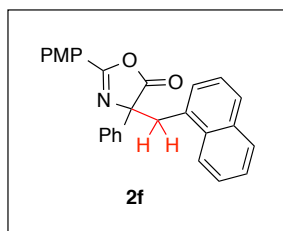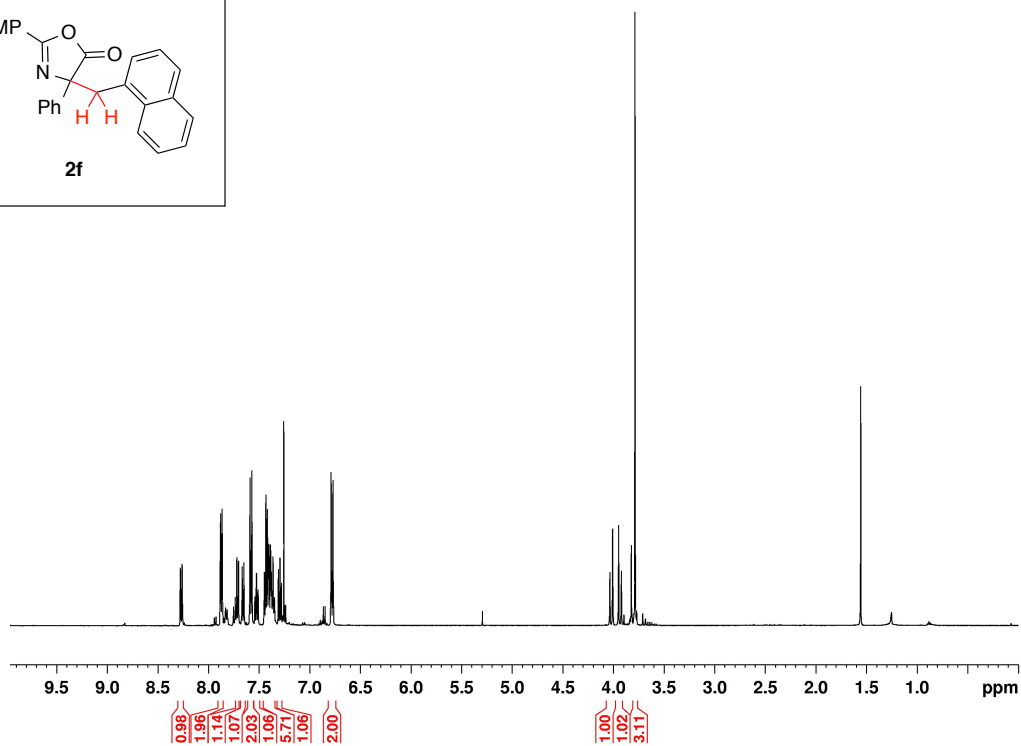

**Scheme 2.** <sup>1</sup>H NMR spectrum of compound **2f** (500 MHz, CDCl<sub>3</sub>)

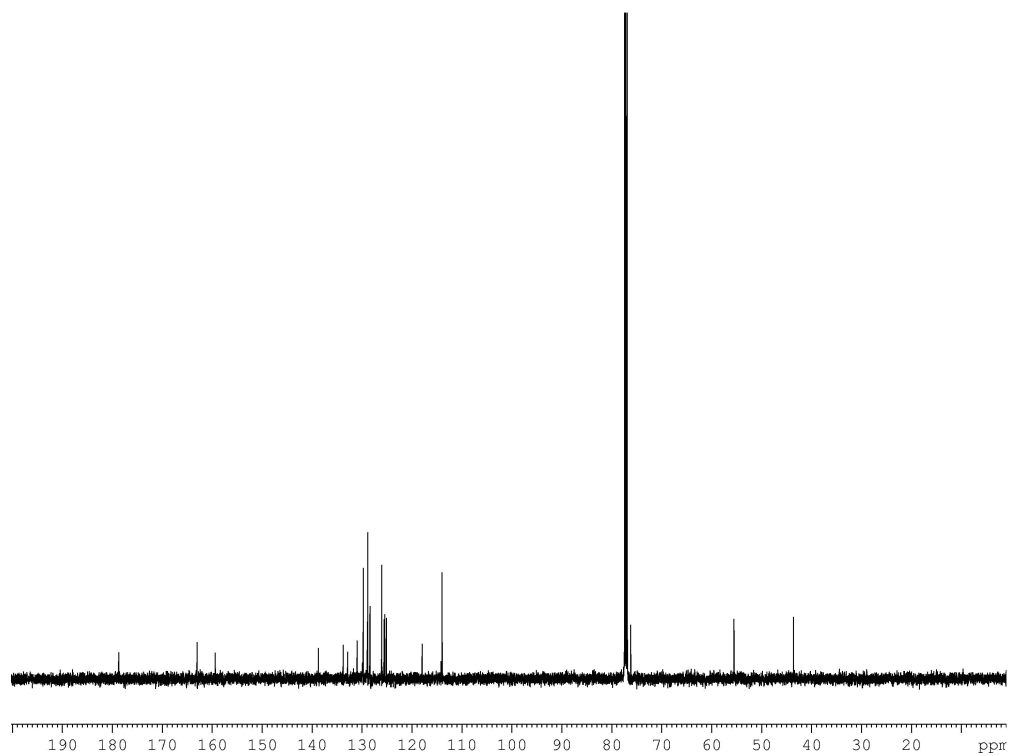

**Scheme 2.** <sup>13</sup>C NMR spectrum of compound **2f** (125 MHz, CDCl<sub>3</sub>)

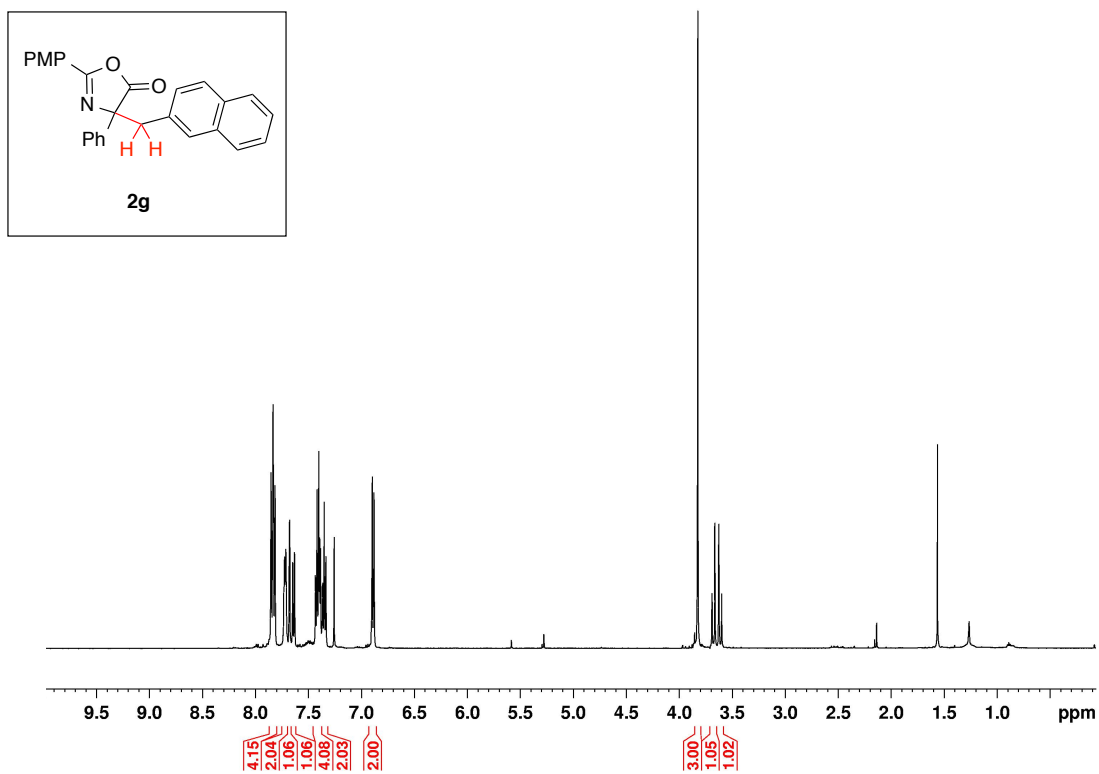

**Scheme 2.** <sup>1</sup>H NMR spectrum of compound **2g** (500 MHz, CDCl<sub>3</sub>)

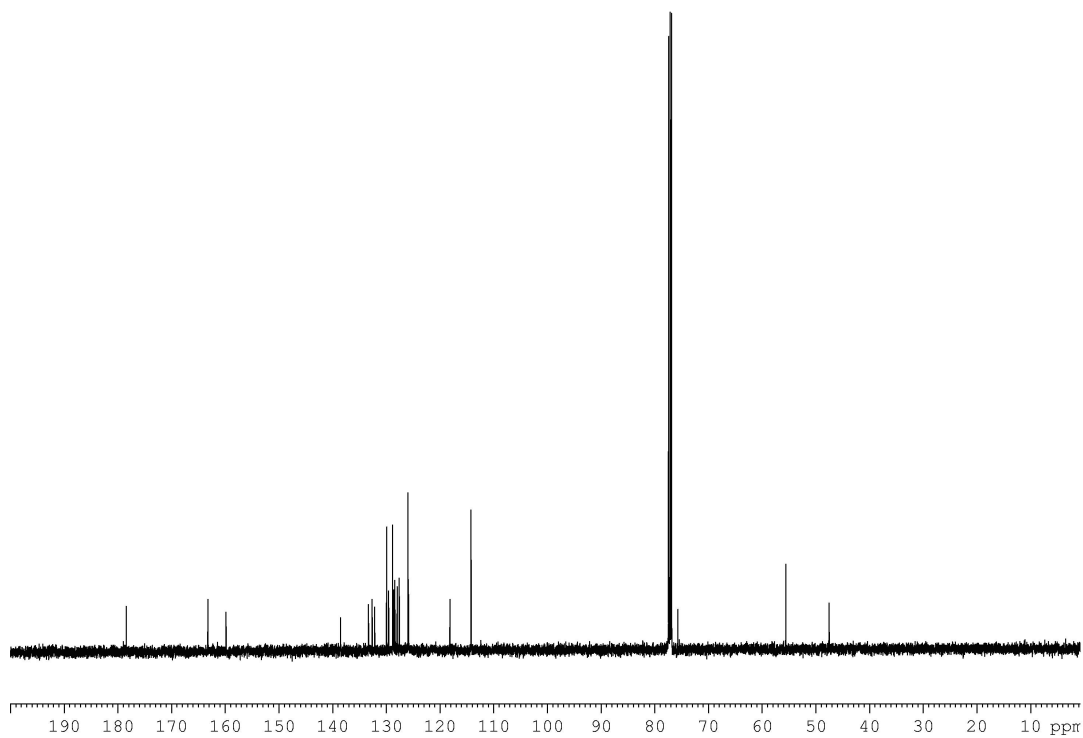

**Scheme 2.** <sup>13</sup>C NMR spectrum of compound **2g** (125 MHz, CDCl<sub>3</sub>)

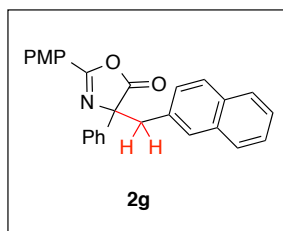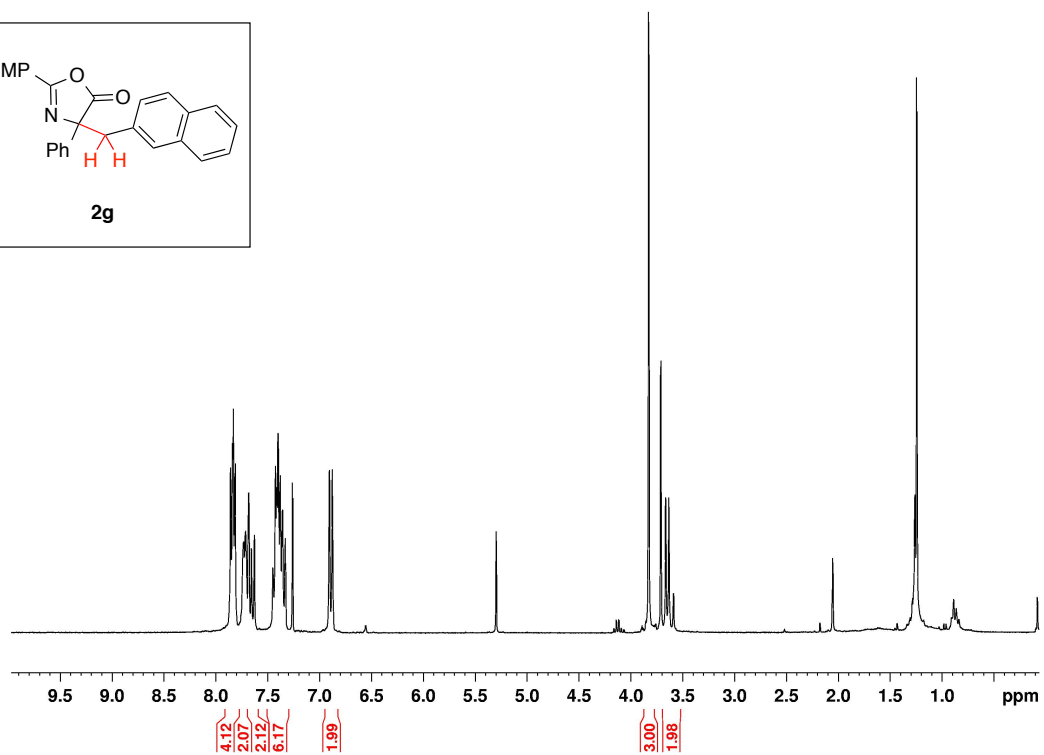

**Scheme 4.** <sup>1</sup>H NMR spectrum of compound **2g** (500 MHz, CDCl<sub>3</sub>)

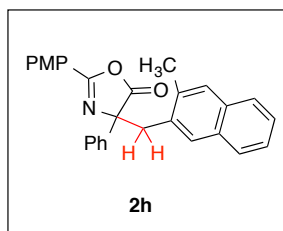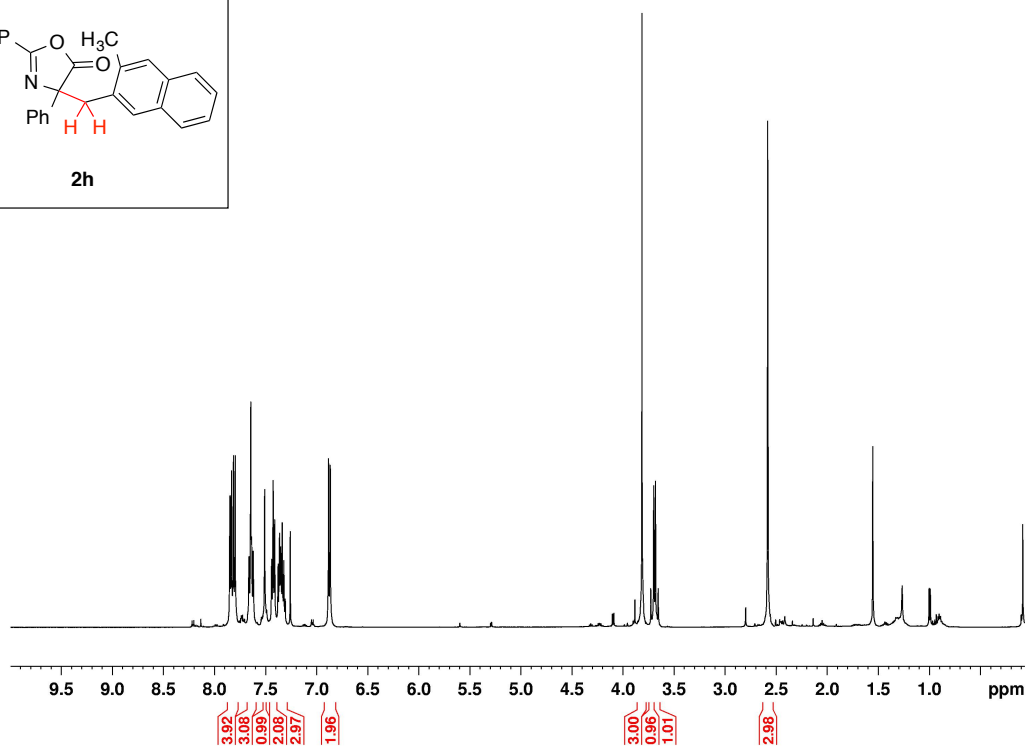

**Scheme 2.** <sup>1</sup>H NMR spectrum of compound **2h** (500 MHz, CDCl<sub>3</sub>)

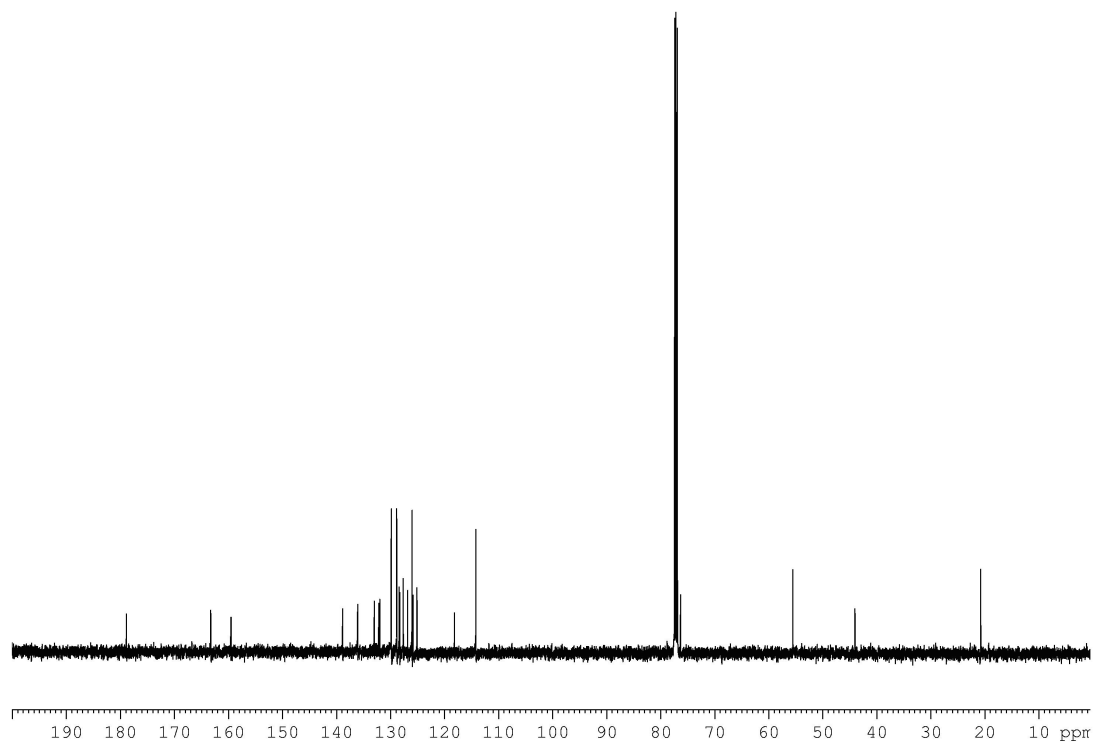

**Scheme 2.** <sup>13</sup>C NMR spectrum of compound **2h** (125 MHz, CDCl<sub>3</sub>)

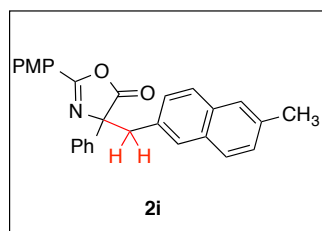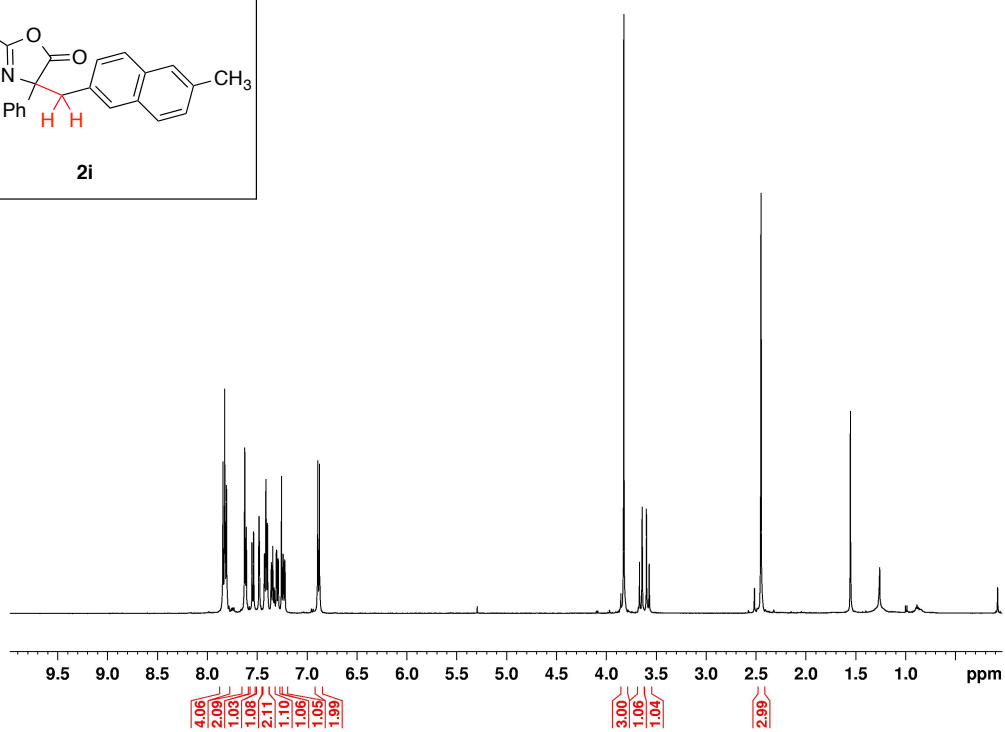

**Scheme 2.**  $^1\text{H}$  NMR spectrum of compound **2i** (500 MHz,  $\text{CDCl}_3$ )

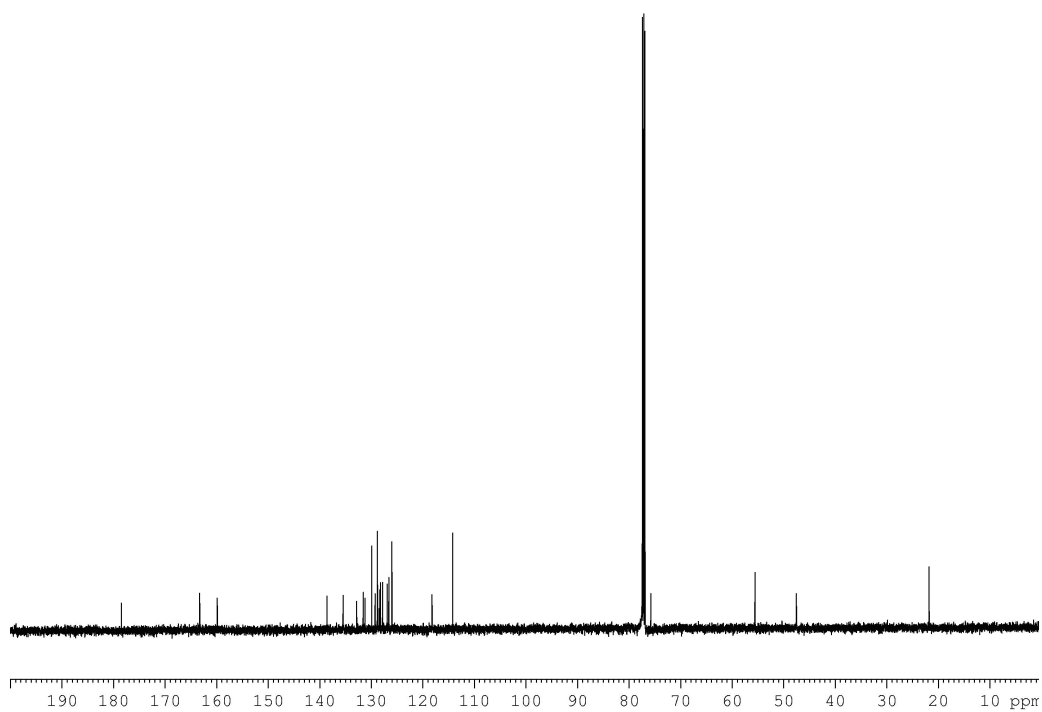

**Scheme 2.**  $^{13}\text{C}$  NMR spectrum of compound **2i** (125 MHz,  $\text{CDCl}_3$ )



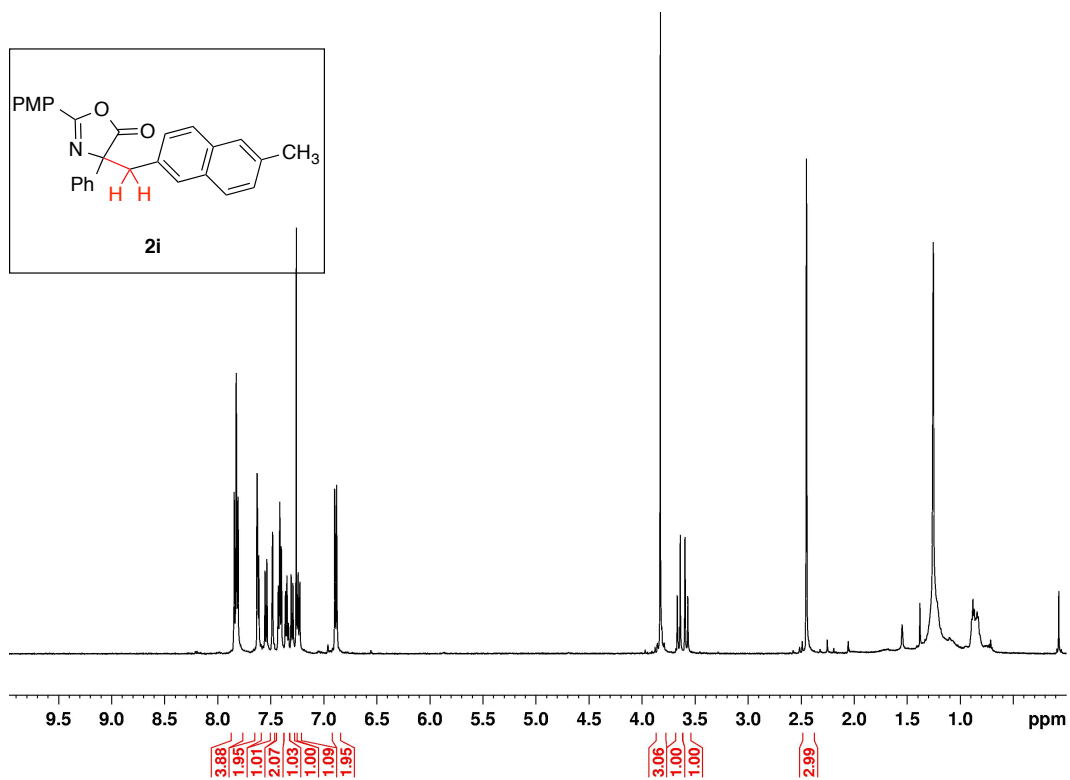

**Scheme 4.** <sup>1</sup>H NMR spectrum of compound **2i** (500 MHz, CDCl<sub>3</sub>)

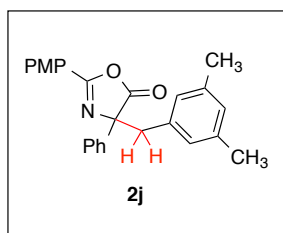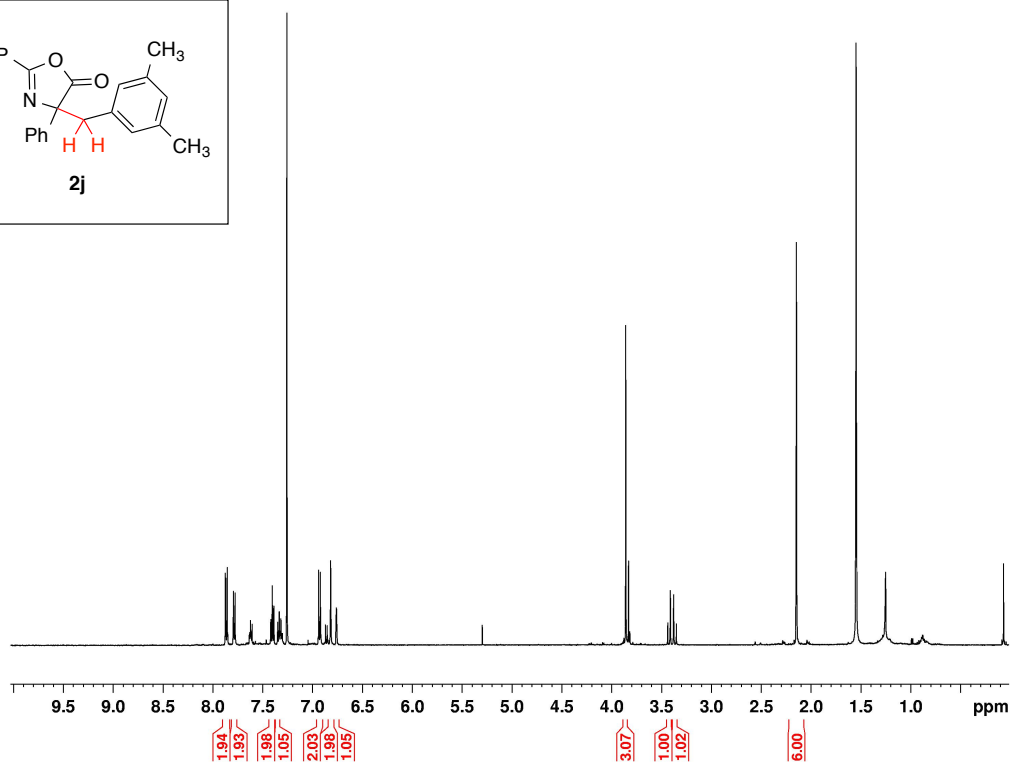

$^1\text{H}$  NMR spectrum of compound **2j** (500 MHz,  $\text{CDCl}_3$ )

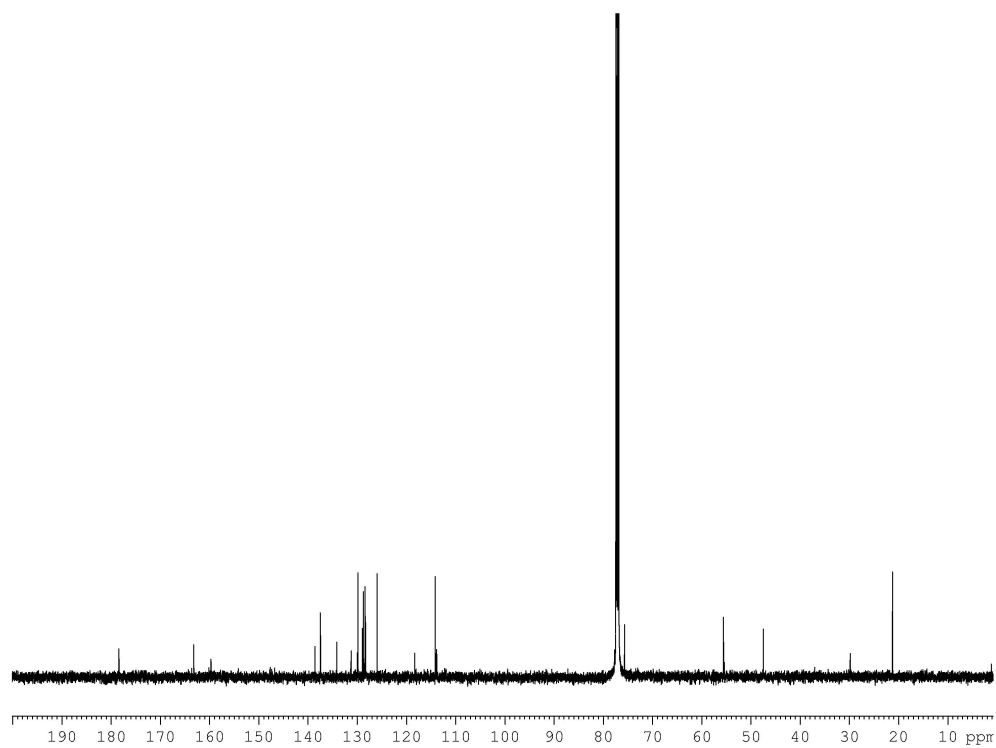

$^{13}\text{C}$  NMR spectrum of compound **2j** (125 MHz,  $\text{CDCl}_3$ )

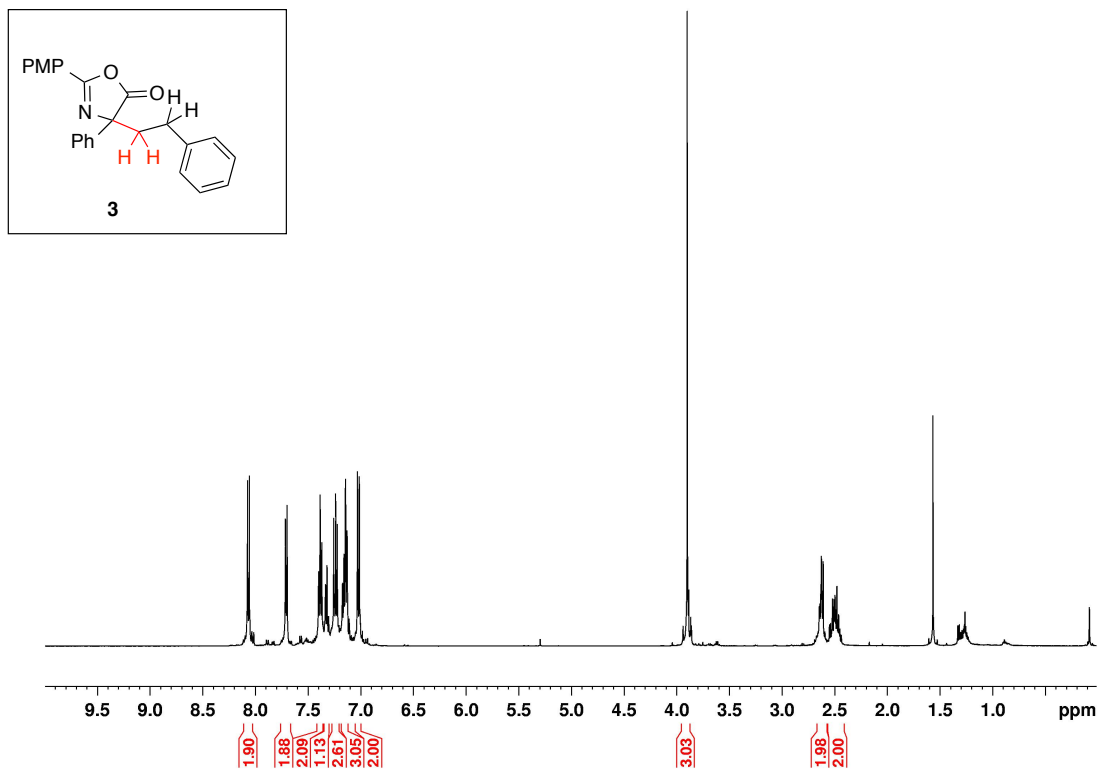

**Scheme 3.**  $^1\text{H}$  NMR spectrum of compound **3** (500 MHz,  $\text{CDCl}_3$ )

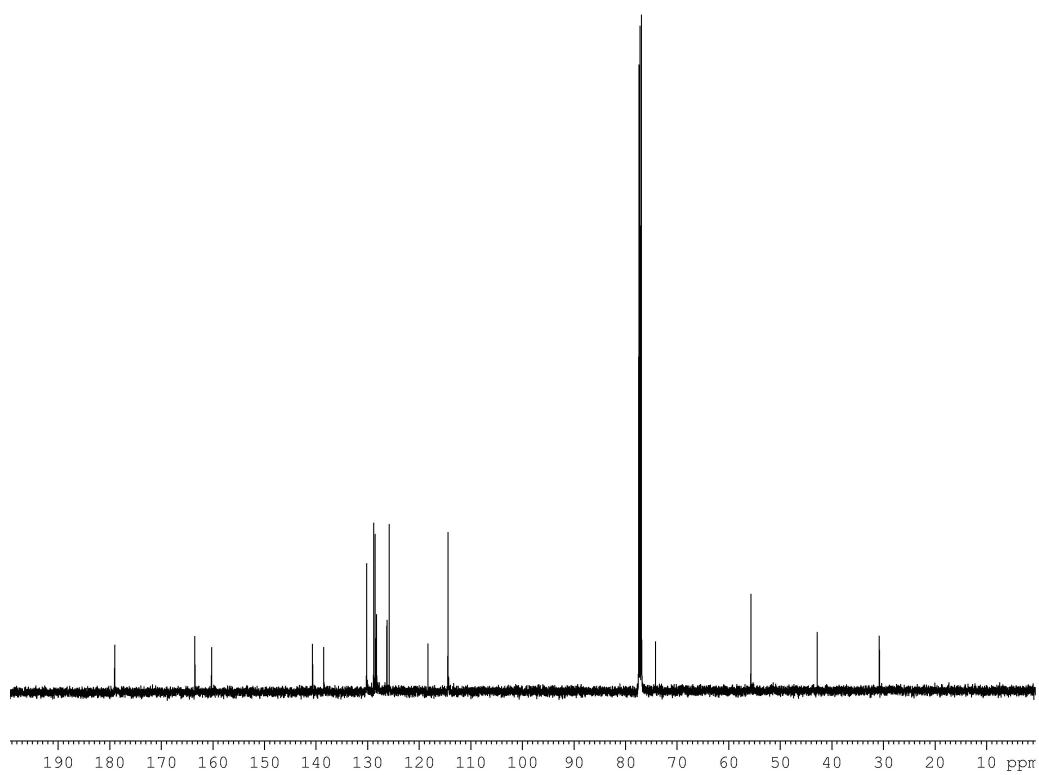

**Scheme 3.**  $^{13}\text{C}$  NMR spectrum of compound **3** (125 MHz,  $\text{CDCl}_3$ )

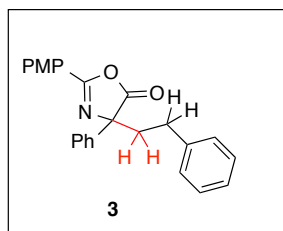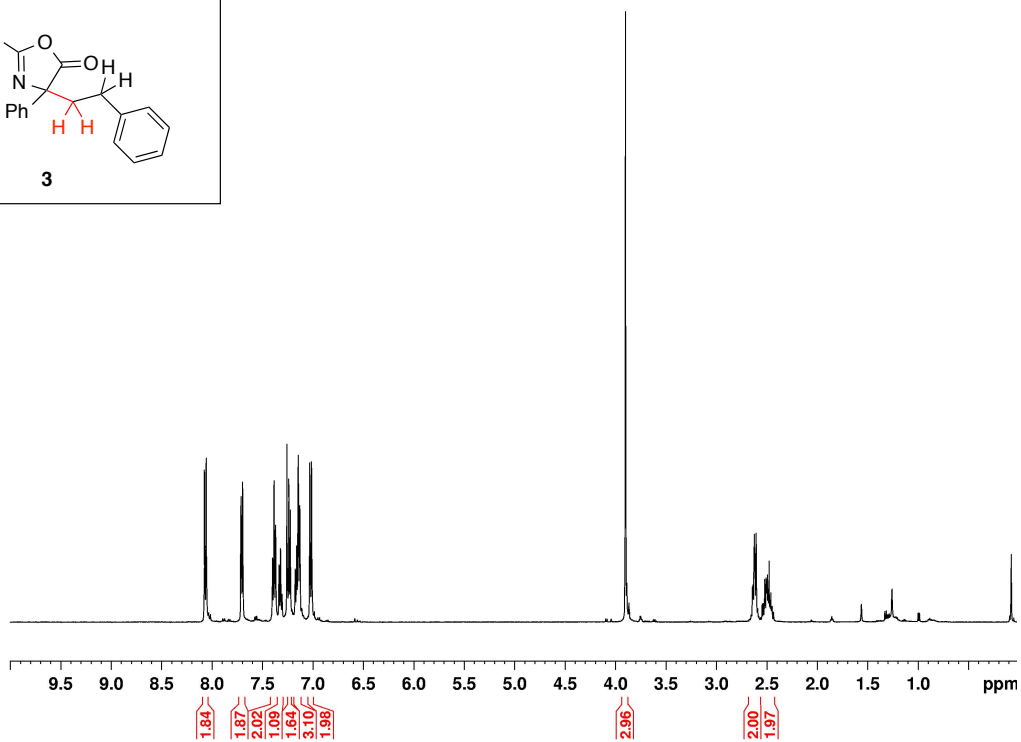

**Scheme 4.**  $^1\text{H}$  NMR spectrum of compound **3** (500 MHz,  $\text{CDCl}_3$ )

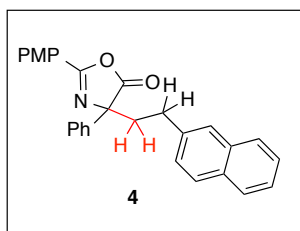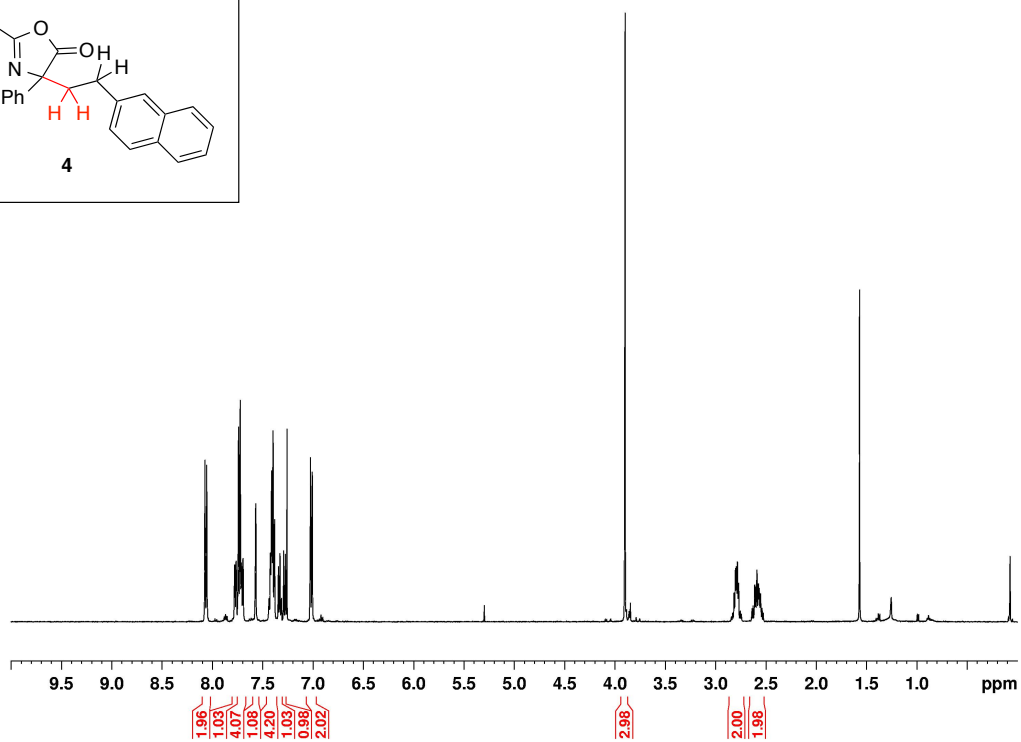

**Scheme 3.**  $^1\text{H}$  NMR spectrum of compound 4 (500 MHz,  $\text{CDCl}_3$ )

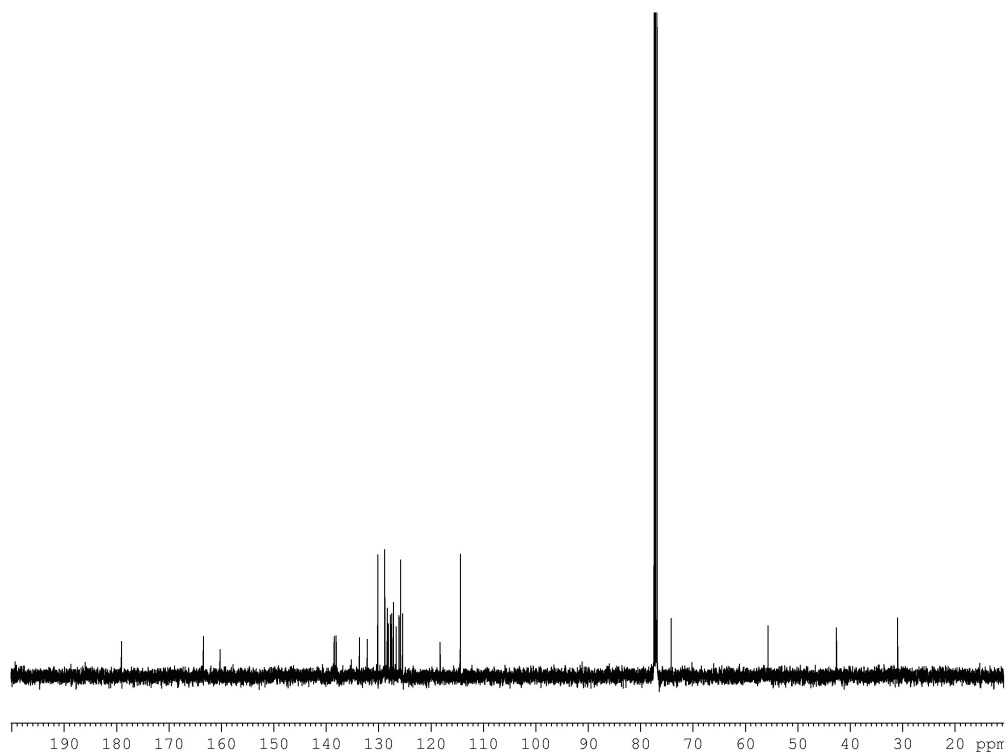

**Scheme 3.**  $^{13}\text{C}$  NMR spectrum of compound 4 (125 MHz,  $\text{CDCl}_3$ )

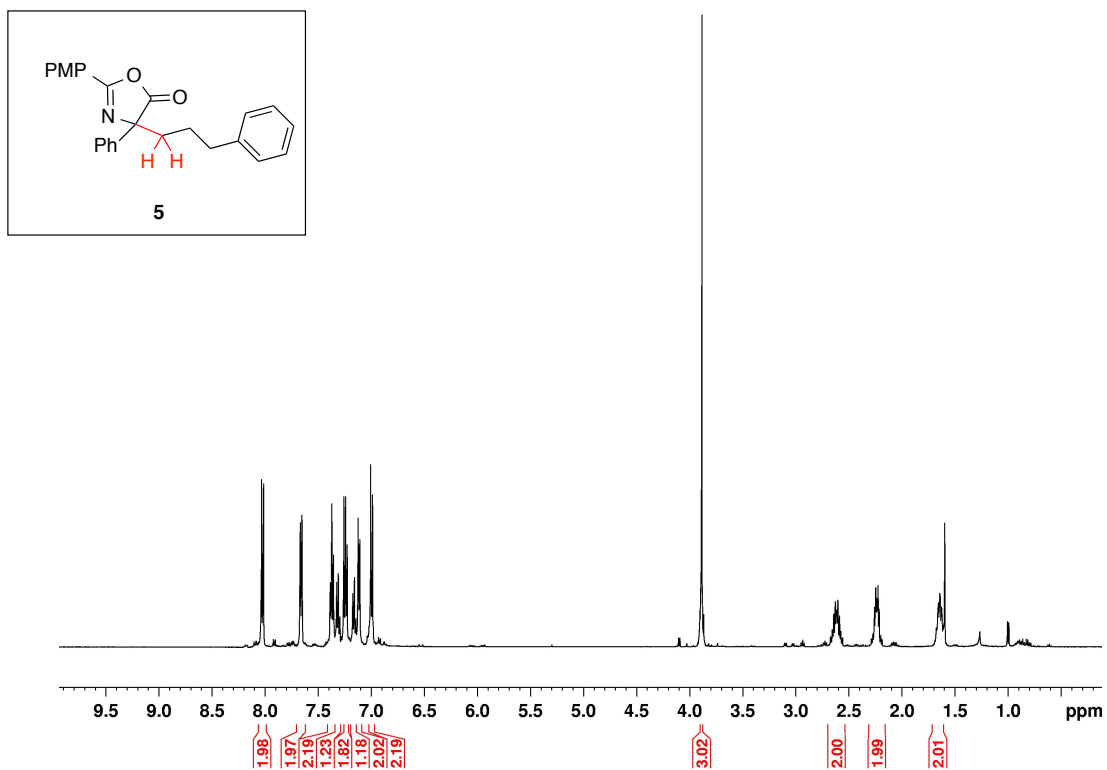

**Scheme 3.**  $^1\text{H}$  NMR spectrum of compound **5** (500 MHz,  $\text{CDCl}_3$ )

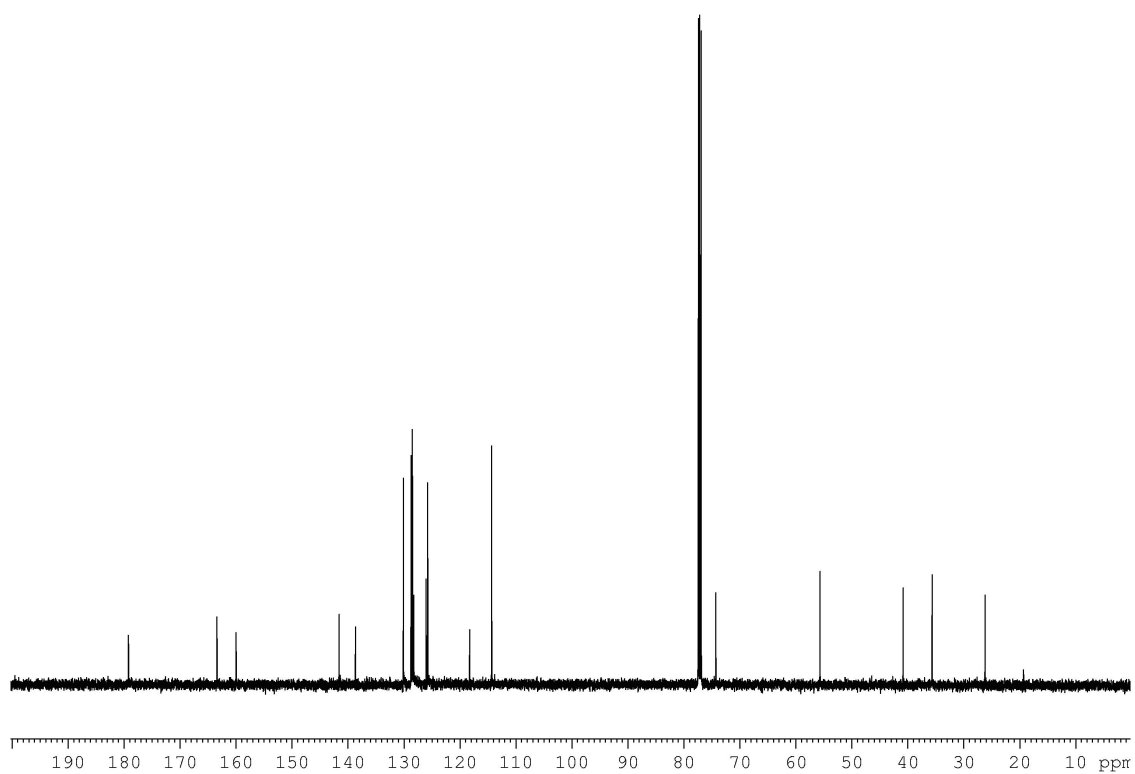

**Scheme 3.**  $^{13}\text{C}$  NMR spectrum of compound **5** (125 MHz,  $\text{CDCl}_3$ )

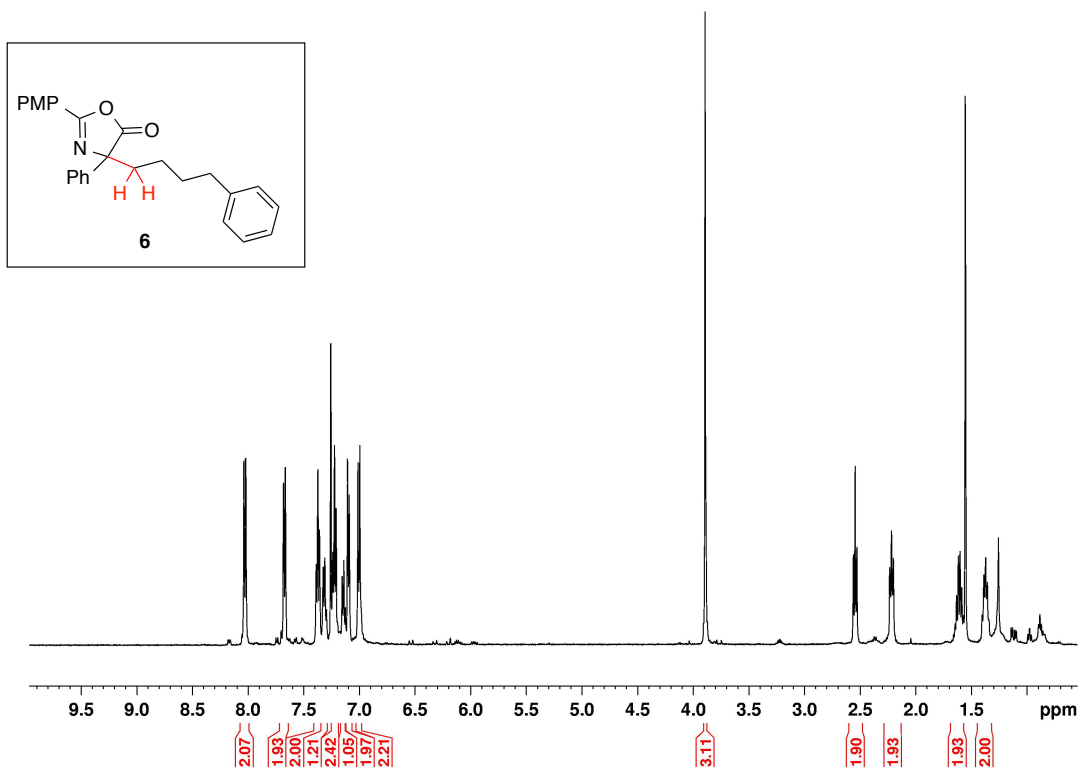

**Scheme 3.**  $^1\text{H}$  NMR spectrum of compound 4 (500 MHz,  $\text{CDCl}_3$ )

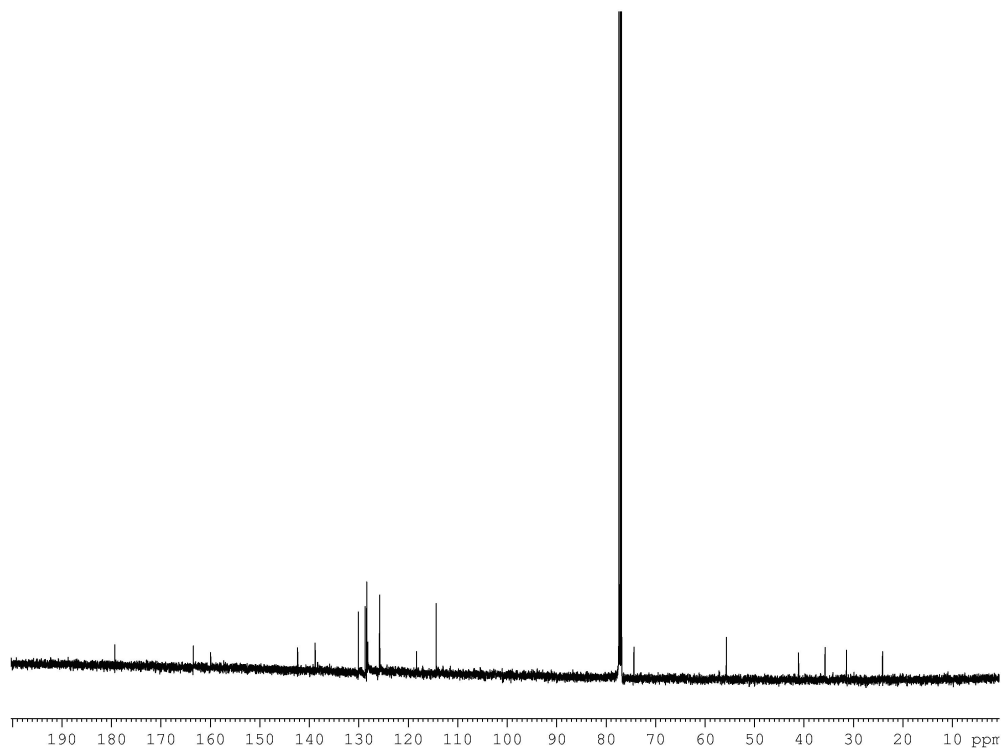

**Scheme 3.**  $^{13}\text{C}$  NMR spectrum of compound 6 (125 MHz,  $\text{CDCl}_3$ )
